# Supplementary material for: Assessment of the toxicity and biodegradation of amino acid-based ionic liquids
Source: PubMed Central journal article supplement — RSC Adv. 2019 Apr 1;9(18):10100–8. doi: 10.1039/c8ra06929h (PMC9062378; doi:10.1039/c8ra06929h), 2019-04-01

Electronic Supplementary Material (ESI) for RSC Advances.

### Supporting Information

#### Assessment of the toxicity and biodegradation of amino acid-based ionic liquids

Shuanggen Wu,<sup>b</sup> Fenfang Li,<sup>b</sup> Liangbin Zeng,<sup>a</sup> Chaoyun Wang,<sup>a</sup> Yuanru Yang<sup>a</sup> and Zhijian Tan<sup>a\*</sup>

a. Institute of Bast Fiber Crops and Center of Southern Economic Crops, Chinese Academy of  
Agricultural Sciences, Changsha 410205, China;

b. College of Chemistry and Chemical Engineering, Central South University, Changsha 410083, China

#### \*Corresponding author

E-mail address: tanzhijian@caas.cn; tanzhijiantgzy2010@aliyun.com

#### Pages S1-S8

#### Contents (contains 7 tables)

|                                                                           |   |
|---------------------------------------------------------------------------|---|
| Antimicrobial Screening Result                                            | 2 |
| MIC and MBC values (in mM) of AAILs                                       | 5 |
| Toxicity of AAILs at various concentrations against rice seed germination | 6 |
| Characterization of the ionic liquids                                     | 9 |

## Antimicrobial Screening Result

**Table S1** Growth inhibition halo (cm) for the AAILs against the bacteria *B. subtilis*

| ILs                          | ILs concentration (mol/L) |           |           |           |           |
|------------------------------|---------------------------|-----------|-----------|-----------|-----------|
|                              | 0.0625                    | 0.125     | 0.25      | 0.50      | 1.00      |
| [C <sub>4</sub> mim][Pro]    | 0.00                      | 0.70±0.00 | 0.80±0.00 | 0.93±0.06 | 1.17±0.06 |
| [C <sub>4</sub> mim][Val]    | 0.00                      | 0.00      | 0.00      | 1.00±0.00 | 1.27±0.03 |
| [C <sub>4</sub> mim][Gly]    | 0.00                      | 0.00      | 0.80±0.00 | 1.00±0.00 | 1.03±0.06 |
| [C <sub>4</sub> mim][Cys]    | 0.00                      | 0.00      | 0.52±0.02 | 0.71±0.01 | 0.93±0.04 |
| [C <sub>4</sub> mim][His]    | 0.00                      | 0.65±0.04 | 0.77±0.06 | 1.00±0.00 | 1.13±0.06 |
| [C <sub>4</sub> mim][Phe]    | 0.00                      | 0.70±0.00 | 0.87±0.06 | 1.00±0.10 | 1.17±0.12 |
| [C <sub>4</sub> mim][Asp]    | 0.00                      | 0.00      | 0.00      | 0.60±0.00 | 0.64±0.00 |
| [Cho][Gly]                   | 0.00                      | 0.00      | 0.00      | 0.77±0.06 | 0.90±0.01 |
| [Cho][Pro]                   | 0.00                      | 0.00      | 0.70±0.00 | 0.80±0.00 | 1.03±0.06 |
| [Cho][His]                   | 0.00                      | 0.00      | 0.00      | 0.60±0.00 | 0.90±0.02 |
| [Cho][Phe]                   | 0.00                      | 0.00      | 0.60±0.00 | 0.73±0.06 | 0.87±0.06 |
| [Cho][Asp]                   | 0.00                      | 0.00      | 0.00      | 0.00      | 0.73±0.02 |
| [Cho][Cys]                   | 0.00                      | 0.00      | 0.00      | 0.00      | 1.07±0.04 |
| [C <sub>2</sub> mim][Cys]    | 0.00                      | 0.00      | 0.00      | 0.60±0.00 | 0.70±0.02 |
| [C <sub>6</sub> mim][Cys]    | 0.6±0.00                  | 0.70±0.00 | 0.83±0.06 | 1.63±0.12 | 2.23±0.12 |
| [Pyr][Cys]                   | 0.00                      | 0.00      | 0.00      | 0.6±0.00  | 0.90±0.10 |
| [Pip][Cys]                   | 0.00                      | 0.00      | 0.00      | 0.00      | 0.60±0.02 |
| [N <sub>2,2,2,2</sub> ][Cys] | 0.00                      | 0.00      | 0.00      | 0.00      | 0.70±0.02 |
| [N <sub>4,4,4,4</sub> ][Cys] | 0.00                      | 0.70±0.00 | 0.93±0.06 | 0.97±0.06 | 1.33±0.06 |
| Controls                     | 0.00                      | 0.00      | 0.00      | 0.00      | 0.00      |

**Table S2** Growth inhibition halo (cm) for the AAILs against bacteria the *R. solanacearum*

| ILs                          | ILs concentration (mol/L) |           |           |           |           |
|------------------------------|---------------------------|-----------|-----------|-----------|-----------|
|                              | 0.0625                    | 0.125     | 0.25      | 0.50      | 1.00      |
| [C <sub>4</sub> mim][Pro]    | 0.00                      | 0.60±0.00 | 0.70±0.00 | 0.80±0.00 | 1.07±0.06 |
| [C <sub>4</sub> mim][Val]    | 0.00                      | 0.60±0.00 | 0.70±0.00 | 0.80±0.00 | 0.93±0.06 |
| [C <sub>4</sub> mim][Gly]    | 0.00                      | 0.60±0.00 | 0.70±0.00 | 0.82±0.02 | 1.10±0.00 |
| [C <sub>4</sub> mim][Cys]    | 0.00                      | 0.00      | 0.00      | 0.70±0.00 | 1.80±0.02 |
| [C <sub>4</sub> mim][His]    | 0.00                      | 0.60±0.00 | 0.70±0.00 | 0.87±0.06 | 1.10±0.00 |
| [C <sub>4</sub> mim][Phe]    | 0.00                      | 0.60±0.00 | 0.70±0.00 | 0.80±0.00 | 0.97±0.06 |
| [C <sub>4</sub> mim][Asp]    | 0.00                      | 0.00      | 0.00      | 0.00      | 0.60±0.00 |
| [Cho][Gly]                   | 0.00                      | 0.00      | 0.60±0.00 | 0.70±0.00 | 0.80±0.02 |
| [Cho][Pro]                   | 0.00                      | 0.00      | 0.60±0.00 | 0.8±0.00  | 0.80±0.02 |
| [Cho][His]                   | 0.00                      | 0.00      | 0.00      | 0.00      | 0.60±0.02 |
| [Cho][Phe]                   | 0.00                      | 0.00      | 0.00      | 0.6±0.00  | 0.70±0.04 |
| [Cho][Asp]                   | 0.00                      | 0.00      | 0.00      | 0.00      | 0.12±0.01 |
| [Cho][Cys]                   | 0.00                      | 0.00      | 0.00      | 1.30±0.00 | 0.50±0.03 |
| [C <sub>2</sub> mim][Cys]    | 0.00                      | 0.00      | 0.00      | 0.60±0.00 | 1.47±0.06 |
| [C <sub>6</sub> mim][Cys]    | 0.00                      | 0.69±0.01 | 0.77±0.06 | 1.63±0.06 | 2.00±0.02 |
| [Pyr][Cys]                   | 0.00                      | 0.00      | 0.00      | 0.00      | 0.60±0.03 |
| [Pip][Cys]                   | 0.00                      | 0.00      | 0.00      | 0.00      | 1.00±0.02 |
| [N <sub>2,2,2,2</sub> ][Cys] | 0.00                      | 0.00      | 0.00      | 0.60±0    | 0.67±0.04 |
| [N <sub>4,4,4,4</sub> ][Cys] | 0.00                      | 0.00      | 0.70±0.00 | 0.87±0.06 | 1.20±0.03 |
| Controls                     | 0.00                      | 0.00      | 0.00      | 0.00      | 0.00      |

**Table S3** Growth inhibition halo (cm) for the AAILs against bacteria the *E. coli*

| AAILs                        | AAILs concentration (mol/L) |           |           |           |           |
|------------------------------|-----------------------------|-----------|-----------|-----------|-----------|
|                              | 0.0625                      | 0.125     | 0.25      | 0.50      | 1.00      |
| [C <sub>4</sub> mim][Pro]    | 0.00                        | 0.00      | 0.80±0.00 | 1.10±0.00 | 1.40±0.00 |
| [C <sub>4</sub> mim][Val]    | 0.00                        | 0.73±0.06 | 1.00±0.00 | 1.23±0.06 | 1.60±0.00 |
| [C <sub>4</sub> mim][Gly]    | 0.00                        | 0.00      | 0.90±0.00 | 1.17±0.06 | 1.53±0.06 |
| [C <sub>4</sub> mim][Cys]    | 0.00                        | 0.00      | 0.00      | 0.86±0.04 | 1.20±0.03 |
| [C <sub>4</sub> mim][His]    | 0.00                        | 0.00      | 0.83±0.06 | 1.23±0.06 | 1.47±0.06 |
| [C <sub>4</sub> mim][Phe]    | 0.00                        | 0.71±0.01 | 1.03±0.06 | 1.21±0.01 | 1.60±0.10 |
| [C <sub>4</sub> mim][Asp]    | 0.00                        | 0.00      | 0.00      | 0.70±0.00 | 0.97±0.06 |
| [Cho][Gly]                   | 0.00                        | 0.00      | 0.00      | 0.00      | 0.83±0.06 |
| [Cho][Pro]                   | 0.00                        | 0.00      | 0.00      | 0.00      | 0.70±0.02 |
| [Cho][His]                   | 0.00                        | 0.00      | 0.00      | 0.00      | 0.80±0.03 |
| [Cho][Phe]                   | 0.00                        | 0.00      | 0.00      | 0.00      | 0.70±0.02 |
| [Cho][Asp]                   | 0.00                        | 0.00      | 0.00      | 0.00      | 0.20±0.02 |
| [Cho][Cys]                   | 0.00                        | 0.00      | 0.00      | 0.00      | 0.40±0.03 |
| [C <sub>2</sub> mim][Cys]    | 0.00                        | 0.00      | 0.00      | 0.00      | 0.93±0.06 |
| [C <sub>6</sub> mim][Cys]    | 0.60±0.00                   | 0.90±0.00 | 1.20±0.00 | 1.47±0.06 | 1.70±0.02 |
| [Pyr][Cys]                   | 0.00                        | 0.00      | 0.00      | 0.00      | 0.70±0.01 |
| [Pip][Cys]                   | 0.00                        | 0.00      | 0.00      | 0.00      | 0.50±0.02 |
| [N <sub>2,2,2,2</sub> ][Cys] | 0.00                        | 0.00      | 0.00      | 0.70±0.00 | 1.00±0.04 |
| [N <sub>4,4,4,4</sub> ][Cys] | 0.00                        | 0.80±0.00 | 1.00±0.00 | 1.33±0.06 | 1.67±0.06 |
| Controls                     | 0.00                        | 0.00      | 0.00      | 0.00      | 0.00      |

**Table S4.** MIC and MBC values (in mM) of AAILs

| AAILs                        | Bacteria           |      |                        |       |                |       | Yeast             |       |                      |       | Fungi                   |       |                     |       |                         |       |                    |       |
|------------------------------|--------------------|------|------------------------|-------|----------------|-------|-------------------|-------|----------------------|-------|-------------------------|-------|---------------------|-------|-------------------------|-------|--------------------|-------|
|                              | <i>B. subtilis</i> |      | <i>R. solanacearum</i> |       | <i>E. coli</i> |       | <i>S. stipits</i> |       | <i>S. cerevisiae</i> |       | <i>P. chrysosporium</i> |       | <i>T. sanguinea</i> |       | <i>C. subvermispora</i> |       | <i>F. lignosus</i> |       |
|                              | MIC                | MBC  | MIC                    | MBC   | MIC            | MBC   | MIC               | MBC   | MIC                  | MBC   | MIC                     | MBC   | MIC                 | MBC   | MIC                     | MBC   | MIC                | MBC   |
| [C <sub>4</sub> mim][Pro]    | 15.63              | 31.3 | 62.5                   | 62.5  | 23.4           | 31.3  | 23.4              | 250   | 31.3                 | 62.5  | 15.6                    | 15.6  | 23.4                | 23.4  | 46.9                    | 62.5  | 93.8               | 375   |
| [C <sub>4</sub> mim][Val]    | 11.7               | 31.3 | 46.9                   | 62.5  | 15.6           | 31.3  | 11.7              | 11.7  | 23.4                 | 31.3  | 15.6                    | 15.6  | 23.4                | 23.4  | 46.9                    | 62.5  | 125                | 375   |
| [C <sub>4</sub> mim][Gly]    | 62.5               | 62.5 | 125                    | 125   | 23.4           | 31.3  | 7.8               | 7.8   | 15.6                 | 15.6  | 15.6                    | 15.6  | 23.4                | 31.3  | 62.5                    | 125   | 93.8               | 250   |
| [C <sub>4</sub> mim][Cys]    | 125                | 125  | 125                    | 125   | 23.4           | 31.3  | 62.5              | 500   | 62.5                 | 62.5  | 15.6                    | 15.6  | 93.8                | 93.8  | 62.5                    | 93.8  | 93.8               | 250   |
| [C <sub>4</sub> mim][His]    | 31.3               | 31.3 | 62.5                   | 62.5  | 62.5           | 62.5  | 11.7              | 11.7  | 23.4                 | 61.3  | 15.6                    | 15.6  | 23.4                | 23.4  | 46.9                    | 375   | 125                | 500   |
| [C <sub>4</sub> mim][Phe]    | 23.4               | 46.9 | 250                    | 250   | 125            | 125   | 11.7              | 11.7  | 23.4                 | 31.3  | 93.8                    | 125   | 23.4                | 23.4  | 62.5                    | 62.5  | 93.8               | 250   |
| [C <sub>4</sub> mim][Asp]    | 23.4               | 125  | 500                    | 500   | 46.9           | 46.9  | 93.8              | 500   | 157.5                | 375   | 250                     | 250   | 250                 | 250   | 500                     | 500   | 1000               | 1000  |
| [Cho][Gly]                   | 62.5               | 250  | 93.8                   | 93.8  | 125            | 125   | 125               | 375   | 93.8                 | 93.8  | 23.4                    | 23.4  | 46.9                | 93.8  | 1000                    | >1000 | 750                | >1000 |
| [Cho][Pro]                   | 46.9               | 62.5 | 187.5                  | 250   | 125            | 125   | 93.8              | 187.5 | 125                  | 187.5 | 46.9                    | 62.5  | 46.9                | 62.5  | 750                     | >1000 | 1000               | 1000  |
| [Cho][His]                   | 62.5               | 62.5 | 187.5                  | 250   | 125            | 187.5 | 125               | 500   | 93.8                 | 187.5 | 23.4                    | 23.4  | 46.9                | 62.5  | 500                     | 500   | 500                | 750   |
| [Cho][Phe]                   | 62.5               | 125  | 187.5                  | 500   | 187.5          | 250   | 187.5             | 375   | 125                  | 250   | 31.3                    | 31.3  | 46.9                | 62.5  | 750                     | 1000  | 1000               | >1000 |
| [Cho][Asp]                   | 750                | 750  | >1000                  | >1000 | 750            | 1000  | 500               | 750   | 500                  | 750   | 93.8                    | 93.8  | 250                 | 500   | >1000                   | >1000 | >1000              | >1000 |
| [Cho][Cys]                   | 187.5              | 375  | 375                    | 375   | 375            | 375   | 750               | >1000 | 500                  | 1000  | 62.5                    | 62.5  | 187.5               | 250   | 750                     | 1000  | >1000              | >1000 |
| [C <sub>2</sub> mim][Cys]    | 62.5               | 125  | 250                    | 250   | 31.3           | 31.3  | 93.8              | 500   | 93.8                 | 125   | 15.6                    | 15.6  | 62.5                | 62.5  | 375                     | 500   | 500                | 750   |
| [C <sub>6</sub> mim][Cys]    | 125                | 125  | 62.5                   | 125   | 15.6           | 31.3  | 7.8               | 15.6  | 31.3                 | 31.3  | 15.6                    | 15.6  | 15.6                | 15.6  | 15.6                    | 15.6  | 23.4               | 31.3  |
| [Pyr][Cys]                   | 11.7               | 31.3 | 125                    | 25    | 125            | 125   | 62.5              | 500   | 250                  | 375   | 250                     | 250   | 250                 | 375   | 500                     | 500   | 750                | 1000  |
| [Pip][Cys]                   | 125                | 250  | 375                    | 500   | 125            | 125   | 125               | 250   | 187.5                | 250   | 187.5                   | 187.5 | 125                 | 157.5 | 500                     | >1000 | 750                | >1000 |
| [N <sub>2,2,2,2</sub> ][Cys] | 11.7               | 15.6 | 187.5                  | 500   | 62.5           | 93.8  | 62.5              | 125   | 93.8                 | 250   | 31.3                    | 31.3  | 62.5                | 62.5  | 750                     | >1000 | 1000               | >1000 |
| [N <sub>4,4,4,4</sub> ][Cys] | 15.6               | 62.5 | 46.9                   | 46.9  | 15.6           | 31.3  | 7.8               | 7.8   | 15.6                 | 15.6  | 15.6                    | 15.6  | 15.6                | 15.6  | 46.9                    | 46.9  | 62.5               | 375   |

Toxicity standards

Green: MIC/MBC > 2 mM all strains, or up to solubility limit (preferred); Amber: MIC/MBC 0.25 – 2.0 mM (usable); Red: MIC/MBC < 0.25 mM (undesirable)

**Table S5.** The root inhibition (%) of rice seedling by adding AILs solution (Positive is representative for promoting growth conversely inhibition growth)

| AAILs                        | AAILs concentration (mg/kg) |             |             |             |             |
|------------------------------|-----------------------------|-------------|-------------|-------------|-------------|
|                              | 200                         | 400         | 600         | 800         | 1000        |
| [C <sub>4</sub> mim][Pro]    | -11.08±0.02                 | 22.01±1.80  | -29.43±1.26 | -60.13±1.25 | -100±2.89   |
| [C <sub>4</sub> mim][Val]    | 27.59±0.11                  | 12.04±2.10  | -60.53±2.36 | -98.80±3.56 | -100±2.56   |
| [C <sub>4</sub> mim][Gly]    | 81.83±4.58                  | 27.59±1.2   | -72.49±5.6  | -82.46±2.53 | -100±3.59   |
| [C <sub>4</sub> mim][Cys]    | -22.25±0.18                 | 30.590±3.20 | -47.77±3.20 | -91.23±0.56 | -100±4.58   |
| [C <sub>4</sub> mim][His]    | 57.10±0.26                  | -8.29±1.50  | -41.39±2.36 | -79.27±0.89 | -90.83±3.52 |
| [C <sub>4</sub> mim][Phe]    | -3.91±0.09                  | -13.88±0.12 | -39.79±1.26 | -79.27±1.59 | -100±1.26   |
| [C <sub>4</sub> mim][Asp]    | 4.90±0.40                   | -24.71±1.21 | -38.6±2.61  | -79.53±3.56 | -100±1.59   |
| [Cho][Gly]                   | -9.49±0.11                  | -16.27±1.32 | -13.08±0.26 | -29.03±1.24 | 70.65±1.45  |
| [Cho][Pro]                   | 57.89±4.5                   | 20.02±0.12  | 4.07±0.23   | 15.23±0.26  | 2.87±0.23   |
| [Cho][His]                   | -4.70±0.02                  | -19.06±0.15 | -33.01±1.31 | 9.65±0.23   | -19.06±0.16 |
| [Cho][Phe]                   | 53.91±0.15                  | -14.67±0.28 | -13.48±0.15 | 10.45±0.25  | 13.24±0.15  |
| [Cho][Asp]                   | 864.51±8.90                 | 848.96±7.80 | 946.65±3.65 | 445.85±3.46 | 37.56±0.26  |
| [Cho][Cys]                   | 34.37±1.20                  | 25.2±2.23   | 13.64±0.23  | 29.19±4.56  | 2.07±0.03   |
| [C <sub>2</sub> mim][Cys]    | 24.80±1.10                  | 13.6±0.59   | 20.02±1.23  | -5.5±0.36   | -35.01±0.45 |
| [C <sub>6</sub> mim][Cys]    | -72.09±5.80                 | -100±5.20   | -100±3.56   | -100±2.15   | -100±4.59   |
| [Pyr][Cys]                   | 11.24±0.60                  | 9.25±0.38   | -26.24±1.23 | -46.57±1.26 | -40.99±1.21 |
| [Pip][Cys]                   | 20.81±1.5                   | -1.52±0.03  | -11.88±0.26 | -27.43±0.56 | -9.09±0.02  |
| [N <sub>2,2,2,2</sub> ][Cys] | 6.46±1.0                    | -6.7±0.06   | -9.89±0.25  | -51.75±0.78 | -73.29±0.06 |
| [N <sub>4,4,4,4</sub> ][Cys] | -2.31±0.02                  | -15.87±1.2  | -51.75±1.26 | -100±0.59   | -100±0.26   |
| [C <sub>4</sub> mim][Br]     | -40.99±3.8                  | -100±3.80   | -100±3.12   | -100±0.78   | -100±0.59   |

**Table S6.** The shoot inhibition (%) of rice seedling by adding IAs solution (Positive is representative for promoting growth conversely inhibition growth)

| AAILs                        | AAILs concentration (mg/kg) |             |             |             |             |
|------------------------------|-----------------------------|-------------|-------------|-------------|-------------|
|                              | 200                         | 400         | 600         | 800         | 1000        |
| [C <sub>4</sub> mim][Pro]    | -11.31±0.23                 | 15.61±0.02  | -4.88±0.03  | -9.55±0.26  | -26.16±1.26 |
| [C <sub>4</sub> mim][Val]    | -3.66±0.03                  | 3.62±0.03   | -8.17±0.12  | -20.42±0.24 | -17.97±1.23 |
| [C <sub>4</sub> mim][Gly]    | 11.65±0.02                  | 12.03±0.29  | -1.13±0.23  | -17.97±0.01 | -30.52±1.26 |
| [C <sub>4</sub> mim][Cys]    | 0.02±0.10                   | 16.74±0.36  | -4.12±0.05  | -18.89±0.03 | -22.71±1.78 |
| [C <sub>4</sub> mim][His]    | 17.85±0.03                  | -1.00±0.01  | -8.17±0.09  | -14.68±0.12 | -25.08±1.26 |
| [C <sub>4</sub> mim][Phe]    | 11.11±0.02                  | -7.17±0.02  | -2.43±0.03  | -7.02±0.03  | -17.58±1.23 |
| [C <sub>4</sub> mim][Asp]    | -2.29±0.01                  | -12.68±0.09 | -2.99±0.09  | -23.12±0.03 | -30.98±0.04 |
| [Cho][Gly]                   | 0.70±0.02                   | -2.46±0.01  | -11.62±0.04 | -12.46±0.01 | 1.93±0.02   |
| [Cho][Pro]                   | 7.06±0.01                   | -1.18±0.02  | -6.11±0.07  | -10.54±0.56 | -7.41±0.23  |
| [Cho][His]                   | 1.47±0.02                   | 10.78±0.05  | 5.07±0.02   | -0.06±0.03  | -1.21±0.03  |
| [Cho][Phe]                   | 18.00±1.24                  | 10.68±0.04  | 10.96±0.14  | 15.40±0.07  | 1.16±0.07   |
| [Cho][Asp]                   | 24.20±0.06                  | 24.08±0.06  | 32.15±1.26  | 24.20±0.26  | 20.14±0.05  |
| [Cho][Cys]                   | 12.79±0.08                  | 19.58±0.24  | 13.79±0.78  | 20.22±0.32  | 13.10±0.02  |
| [C <sub>2</sub> mim][Cys]    | 3.84±0.06                   | 5.13±0.07   | -2.20±0.06  | -2.82±0.32  | -4.96±0.23  |
| [C <sub>6</sub> mim][Cys]    | -15.98±0.07                 | -40.71±0.29 | -92.42±1.45 | -94.95±2.89 | -97.47±0.15 |
| [Pyr][Cys]                   | 4.22±0.03                   | -10.04±0.03 | -19.65±0.89 | -12.61±1.23 | -25.77±0.02 |
| [Pip][Cys]                   | 7.59±0.05                   | -3.34±0.01  | 9.43±0.08   | 1.24±0.28   | -3.58±0.12  |
| [N <sub>2,2,2,2</sub> ][Cys] | 0.86±0.01                   | 2.21±0.03   | -5.65±0.09  | -10.01±0.56 | -11.69±0.03 |
| [N <sub>4,4,4,4</sub> ][Cys] | 4.91±0.03                   | -3.61±0.01  | -7.25±0.45  | -20.49±0.78 | -24.63±0.02 |
| [C <sub>4</sub> mim][Br]     | -7.79±0.02                  | -17.97±0.02 | -34.42±0.78 | -41.15±1.26 | -54.09±0.01 |

**Table S7.**The fresh weight inhibition (%) of rice seedling by adding IAs solution (Positive is representative for promoting growth conversely inhibition growth)

| AAILs                        | AAILs concentration (mg/kg) |             |             |             |             |
|------------------------------|-----------------------------|-------------|-------------|-------------|-------------|
|                              | 200                         | 400         | 600         | 800         | 1000        |
| [C <sub>4</sub> mim][Pro]    | 0.00                        | 0.00        | -6.90±0.06  | -10.34±0.23 | -17.24±0.06 |
| [C <sub>4</sub> mim][Val]    | 0.00                        | -6.90±0.02  | -10.34±0.05 | -17.24±0.56 | -20.69±0.26 |
| [C <sub>4</sub> mim][Gly]    | 13.79±0.03                  | -6.90±0.01  | -20.69±0.09 | -27.59±0.12 | -29.31±0.37 |
| [C <sub>4</sub> mim][Cys]    | -10.34±0.03                 | 1.69±0.01   | -12.41±0.03 | -24.14±0.26 | -17.24±0.29 |
| [C <sub>4</sub> mim][His]    | 3.45±0.20                   | -6.90±0.03  | -8.62±0.01  | -20.69±0.25 | -17.24±0.15 |
| [C <sub>4</sub> mim][Phe]    | -6.90±0.23                  | -10.34±0.08 | -10.34±0.06 | -24.14±0.24 | -20.69±0.03 |
| [C <sub>4</sub> mim][Asp]    | 0.00                        | 0.00        | -3.45±0.01  | -6.90±0.56  | -6.90±0.01  |
| [Cho][Gly]                   | -1.72±0.12                  | -2.41±0.03  | -3.45±0.04  | -3.45±0.03  | -17.24±0.05 |
| [Cho][Pro]                   | 0.00                        | 0.00        | 3.45±0.09   | 3.45±0.01   | 7.59±0.06   |
| [Cho][His]                   | 0.00                        | -3.45±0.06  | -4.83±0.05  | -6.21±0.56  | -6.90±0.15  |
| [Cho][Phe]                   | 6.90±0.02                   | 3.45±0.09   | 3.45±0.04   | 1.72±0.03   | -6.90±0.02  |
| [Cho][Asp]                   | 0.00                        | -3.45±0.01  | -3.45±0.06  | -3.45±0.25  | -13.79±0.03 |
| [Cho][Cys]                   | 3.45±0.01                   | 0.00        | -1.38±0.04  | -2.76±0.26  | -3.45±0.01  |
| [C <sub>2</sub> mim][Cys]    | 48.28±0.03                  | 37.93±0.26  | 34.48±0.01  | 24.14±0.23  | -3.45±0.03  |
| [C <sub>6</sub> mim][Cys]    | -6.90±0.04                  | -20.69±0.56 | -6.90±0.23  | -6.90±0.24  | -8.45±0.25  |
| [Pyr][Cys]                   | 0.00±0.02                   | -13.79±0.12 | -13.79±0.56 | -20.69±0.56 | -21.38±0.16 |
| [Pip][Cys]                   | -10.34±0.04                 | -27.59±0.13 | -31.03±0.23 | -34.48±0.78 | -34.48±0.12 |
| [N <sub>2,2,2,2</sub> ][Cys] | 3.45±0.02                   | -10.34±0.03 | -10.34±0.14 | -17.24±0.03 | -20.69±0.02 |
| [N <sub>4,4,4,4</sub> ][Cys] | -10.34±0.03                 | -10.34±0.07 | -10.34±0.56 | -11.38±0.01 | -13.79±0.01 |
| [C <sub>4</sub> mim][Br]     | -10.34±0.04                 | -24.14±0.08 | -31.03±0.78 | -31.03±0.02 | -31.03±0.02 |



### **Characterization of the ionic liquids**

All ILs were characterized by FT-IR spectroscopy and  $^1\text{H}$  NMR, then spectroscopic data of synthesized ILs were analyzed by MestReNova LITE. The  $^1\text{H}$  NMR data obtained from Bruker BioSpin GmbH (400 MHz) using  $\text{D}_2\text{O}$  as solvents. All the results of FT-IR and  $^1\text{H}$ NMR proved that all synthesized ILs were target products.

[Cho][Asp].  $^1\text{H}$  NMR (400 MHz,  $\text{D}_2\text{O}$ )  $\delta$ : 2.52 – 2.73 (m, 2H,  $\text{CH}_2$ ), 3.10 (s, 9H,  $\text{CH}_3$ ,  $\text{CH}_3$ ,  $\text{CH}_3$ ), 3.41 – 3.43 (m, 2H,  $\text{CH}_2$ ), 3.76 – 3.79 (q,  $J = 12$  Hz, 1H, CH-N), 3.94 – 3.97 (m, 2H,  $\text{CH}_2$ ). IR: **Error!** = 3425, 2978, 1596, 1479, 1392, 1349, 1149, 1066, 908, 856  $\text{cm}^{-1}$ .

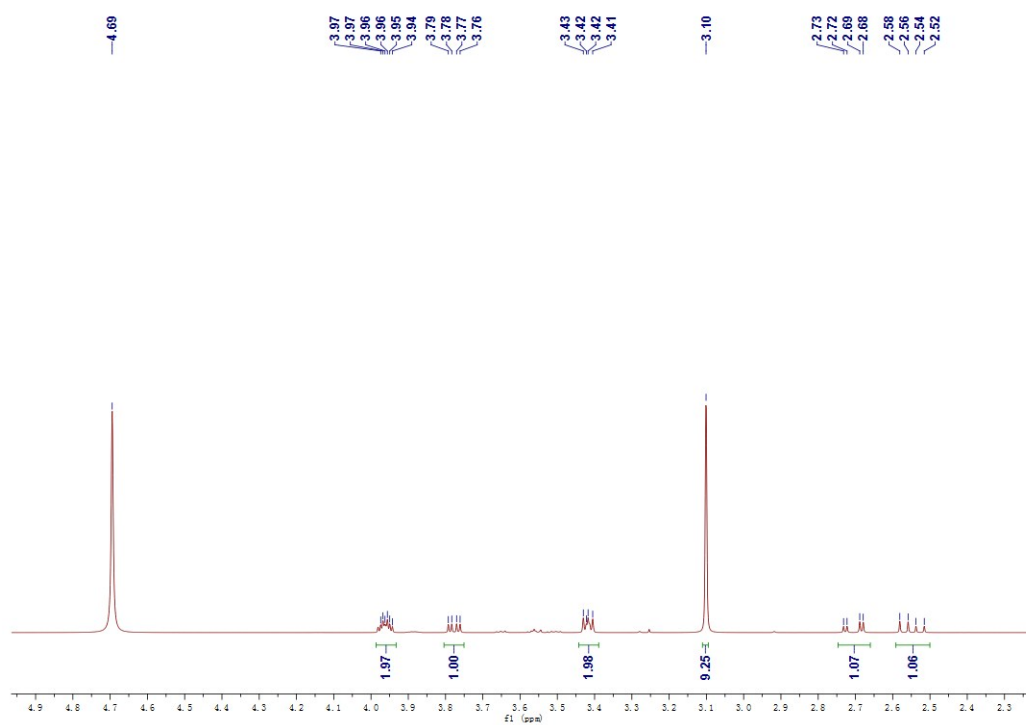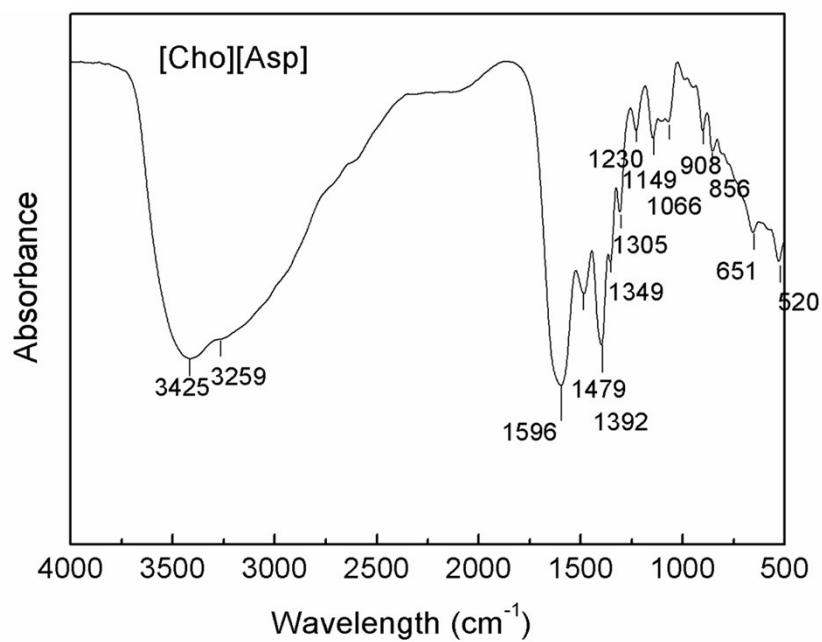

[Cho][Phe].  $^1\text{H}$  NMR (400 MHz,  $\text{D}_2\text{O}$ )  $\delta$ : 2.73 – 2.78 (m, 2H,  $\text{CH}_2$ ), 2.88 – 3.06 (m, 2H,  $\text{CH}_2$ ), 3.06 (s, 9H,  $\text{CH}_3$ ,  $\text{CH}_3$ ,  $\text{CH}_3$ ), 3.38 – 3.41 (m, 2H,  $\text{CH}_2$ ), 3.93 (q,  $J = 5.6, 7.2$  Hz, 1H, CH-N), 7.19 – 7.29 (m, 5H,  $\text{C}_6\text{H}_5$ ). IR: **Error!**= 3463, 3050, 3028, 2940, 1565, 1483, 1405, 1342, 1083, 958  $\text{cm}^{-1}$ .

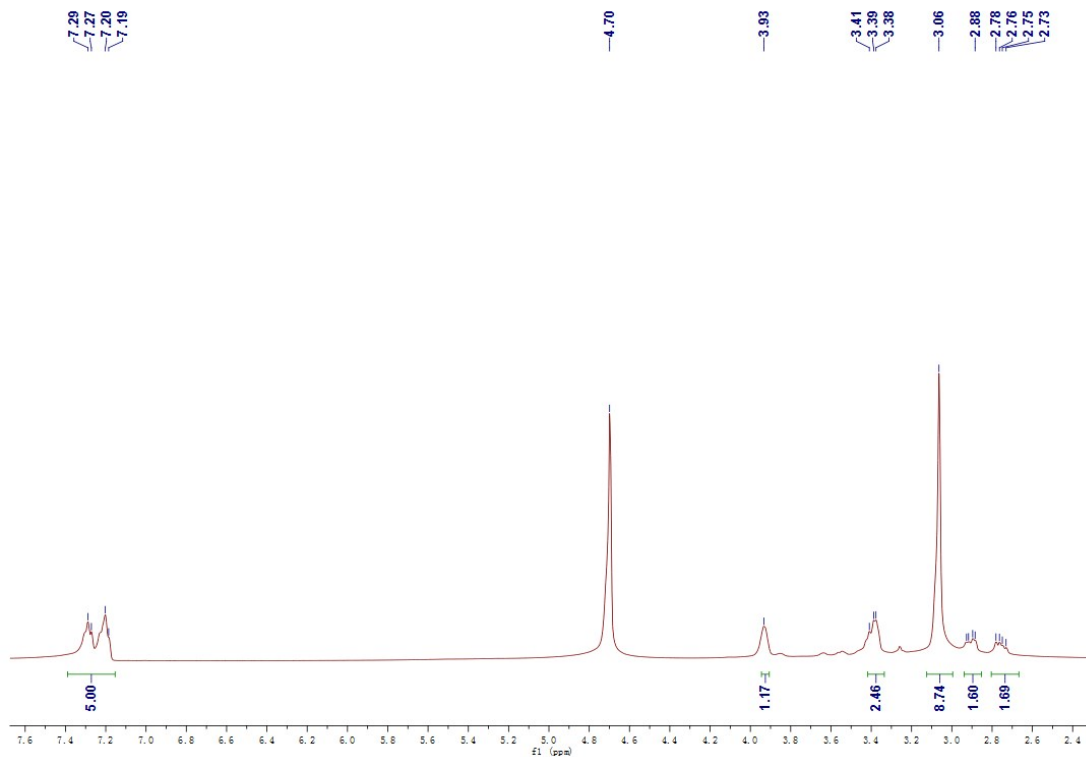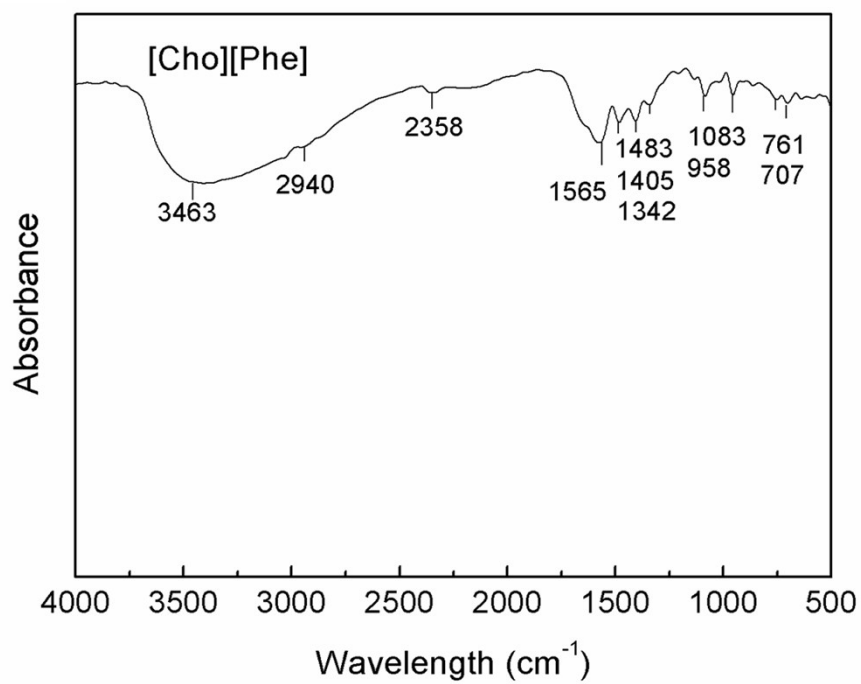

[Cho][His].  $^1\text{H}$  NMR (400 MHz,  $\text{D}_2\text{O}$ )  $\delta$ : 2.69 – 2.87 (m, 2H,  $\text{CH}_2$ ), 3.07 (s, 9H,  $\text{CH}_3$ ,  $\text{CH}_3$ ,  $\text{CH}_3$ ), 3.36 – 3.40 (apparent q,  $J = 16$  Hz, 3H,  $\text{CH}_2$ ,  $\text{CH-N}$ ), 3.92 – 3.95 (m, 2H,  $\text{CH}_2$ ), 6.80 (s, 1H, =CH), 7.55 (s, 1H, =CH). IR: **Error!** = 3399, 2950, 1571, 1479, 1407, 1346, 1085, 956, 677  $\text{cm}^{-1}$ .

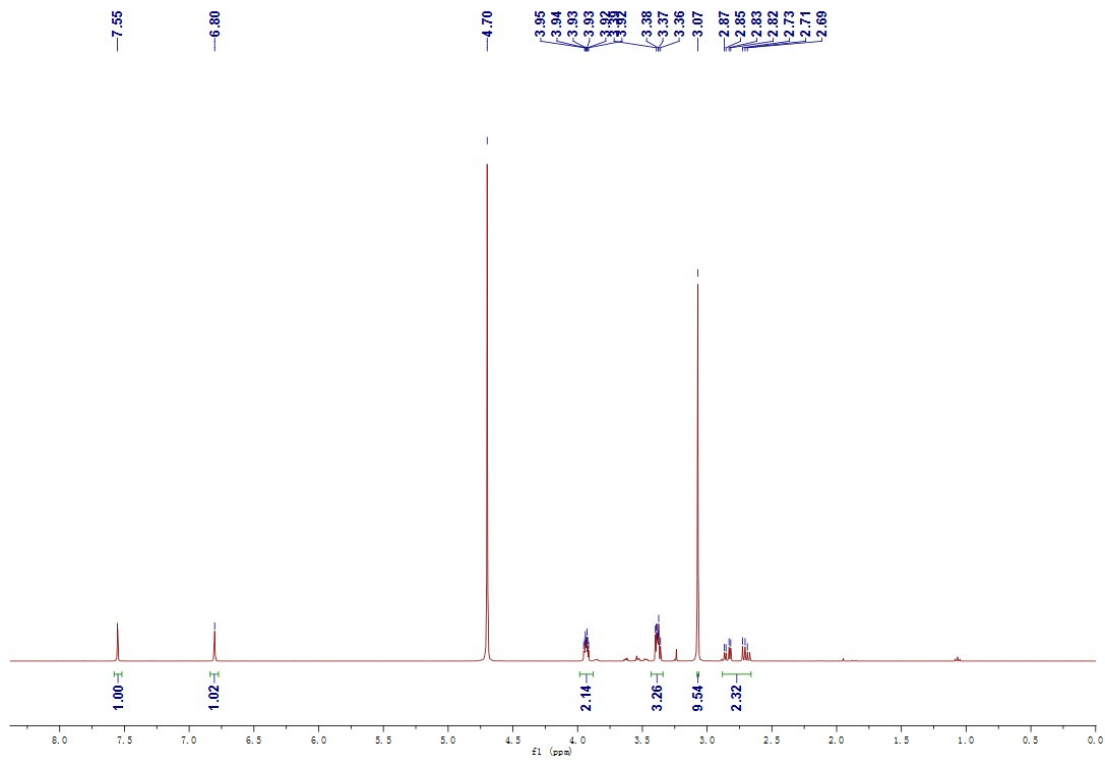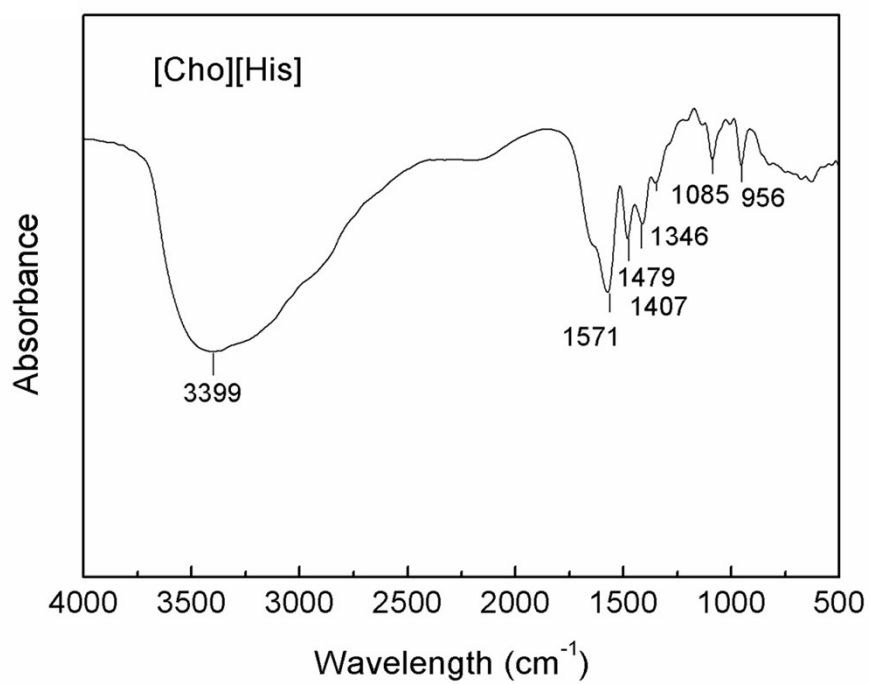

[Cho][Gly].  $^1\text{H}$  NMR (400 MHz,  $\text{D}_2\text{O}$ )  $\delta$ : 3.13 – 3.14 (d,  $J$  = 4.0 Hz, 11H,  $\text{CH}_3$ ,  $\text{CH}_3$ ,  $\text{CH}_3$ ,  $\text{CH}_2$ ), 3.44 – 3.46 (m, 2H,  $\text{CH}_2$ ), 3.98 (s, 2H,  $\text{CH}_2$ -N). IR: **Error!** = 3444, 2978, 1577, 1483, 1400, 1081, 1046, 952, 650  $\text{cm}^{-1}$ .

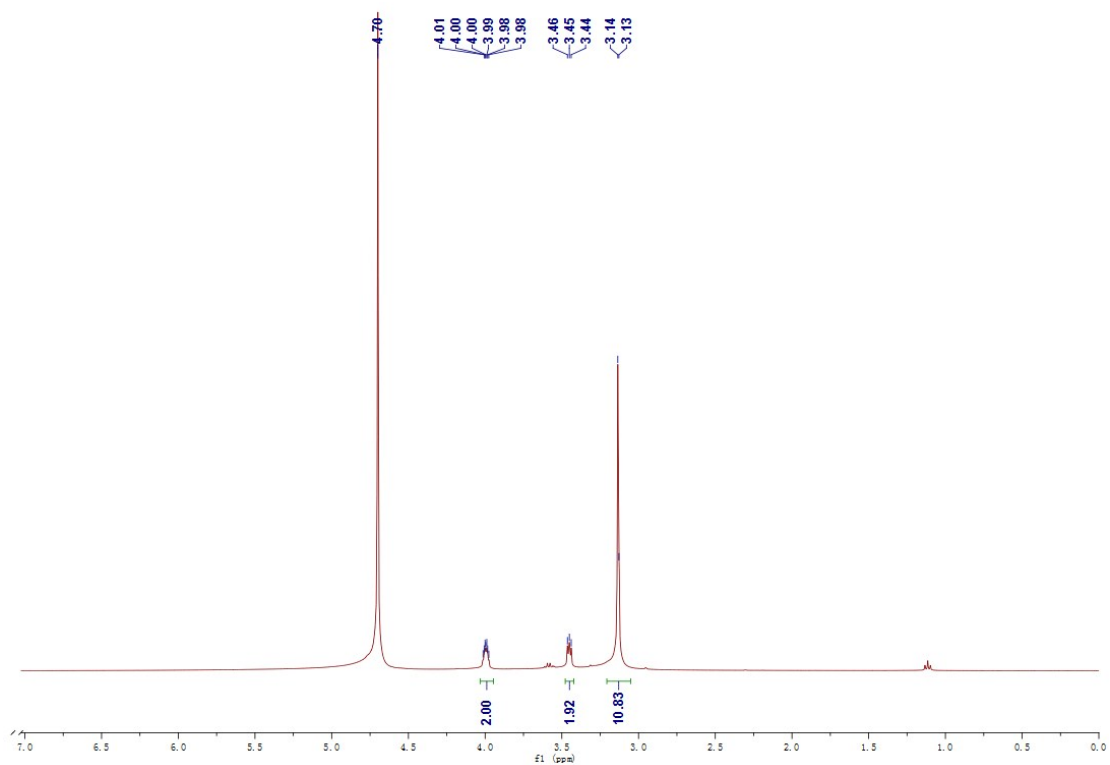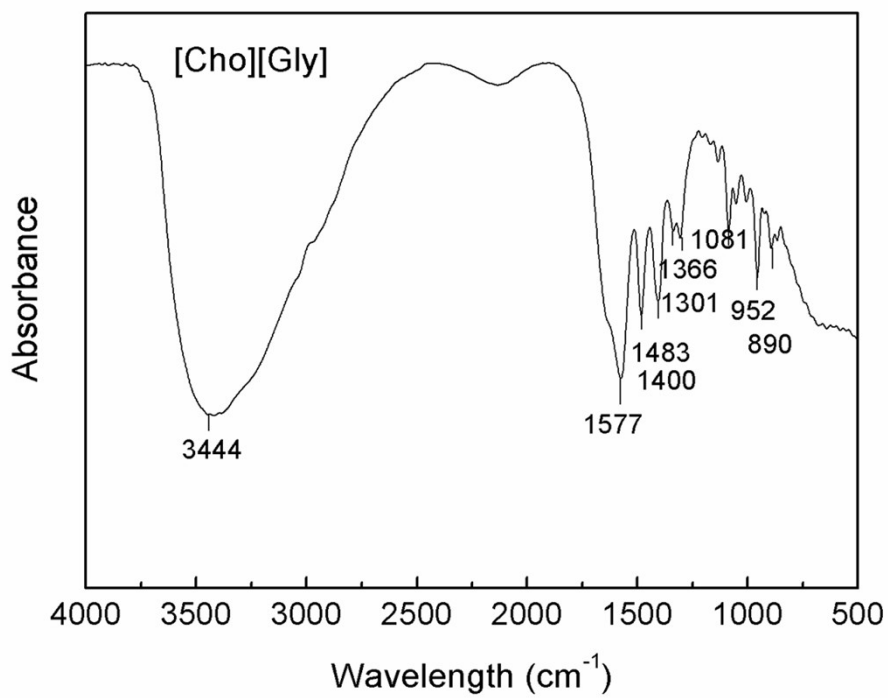

[Cho][Cys].  $^1\text{H}$  NMR (400 MHz,  $\text{D}_2\text{O}$ )  $\delta$ : 2.15 – 2.16 (m, 2H,  $\text{CH}_2$ ), 3.12 (s, 9H,  $\text{CH}_3$ ,  $\text{CH}_3$ ,  $\text{CH}_3$ ), 3.42 – 3.46 (m, 2H,  $\text{CH}_2$ ), 3.54 – 3.60

(q,  $J = 24$  Hz, 1H, CH-N), 3.95 – 3.98 (m, 2H,  $\text{CH}_2$ ). IR: **Error!** = 3407, 2950, 1585, 1471, 1400, 1394, 1288, 1002, 670  $\text{cm}^{-1}$ .

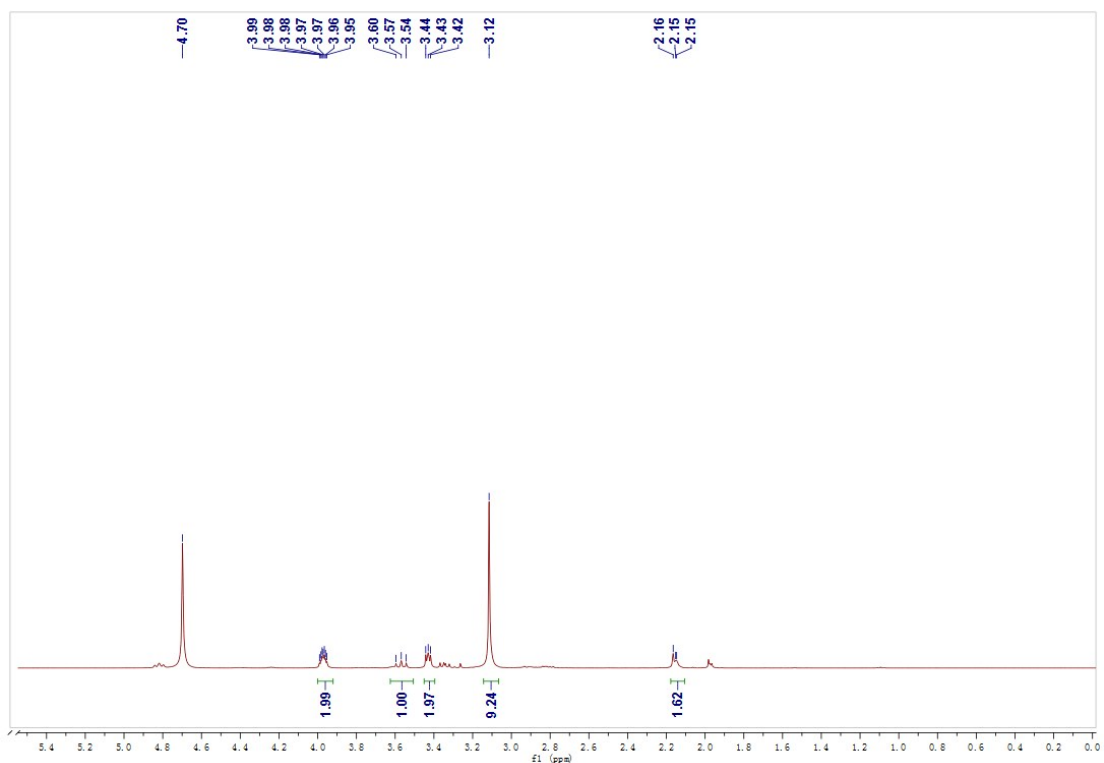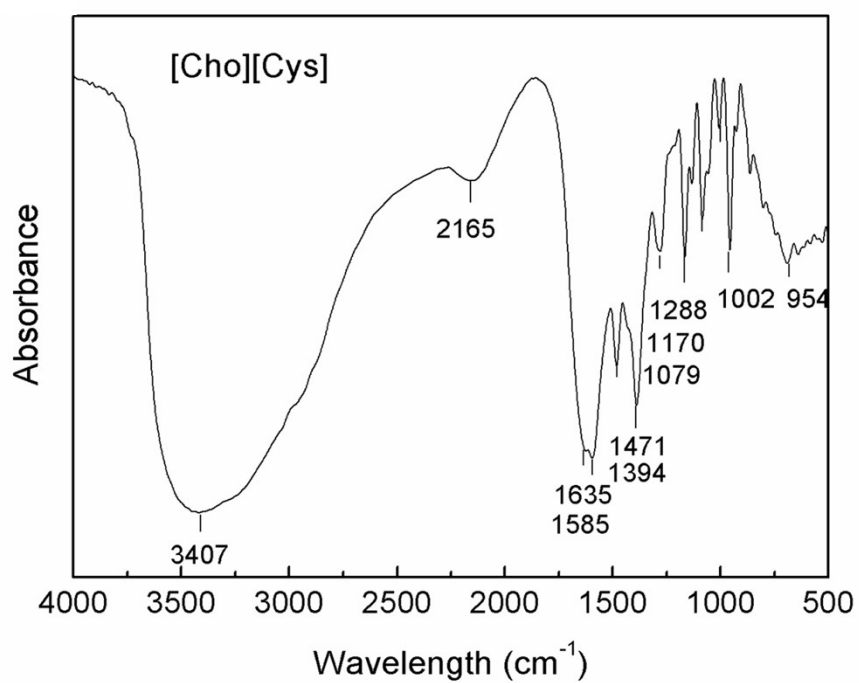

[Cho][Pro].  $^1\text{H}$  NMR (400 MHz,  $\text{D}_2\text{O}$ )  $\delta$ : 1.69 – 1.74 (m, 4H,  $\text{CH}_2$ ,  $\text{CH}_2$ ), 3.02 – 3.05 (t,  $J = 12$  Hz, 1H, CH-N), 3.11 (s, 9H,  $\text{CH}_3$ ,  $\text{CH}_3$ ,  $\text{CH}_3$ ), 3.42 – 3.46 (t,  $J = 16$  Hz, 2H,  $\text{CH}_2$ -N), 3.53 – 3.55 (t,  $J = 8.0$  Hz, 2H,  $\text{CH}_2$ ), 3.95 – 3.99 (t,  $J = 16$  Hz, 2H,  $\text{CH}_2$ ). IR: **Error!** = 3444, 2971, 2869, 1581, 1477, 1419, 1386, 1081, 1078, 958  $\text{cm}^{-1}$ .

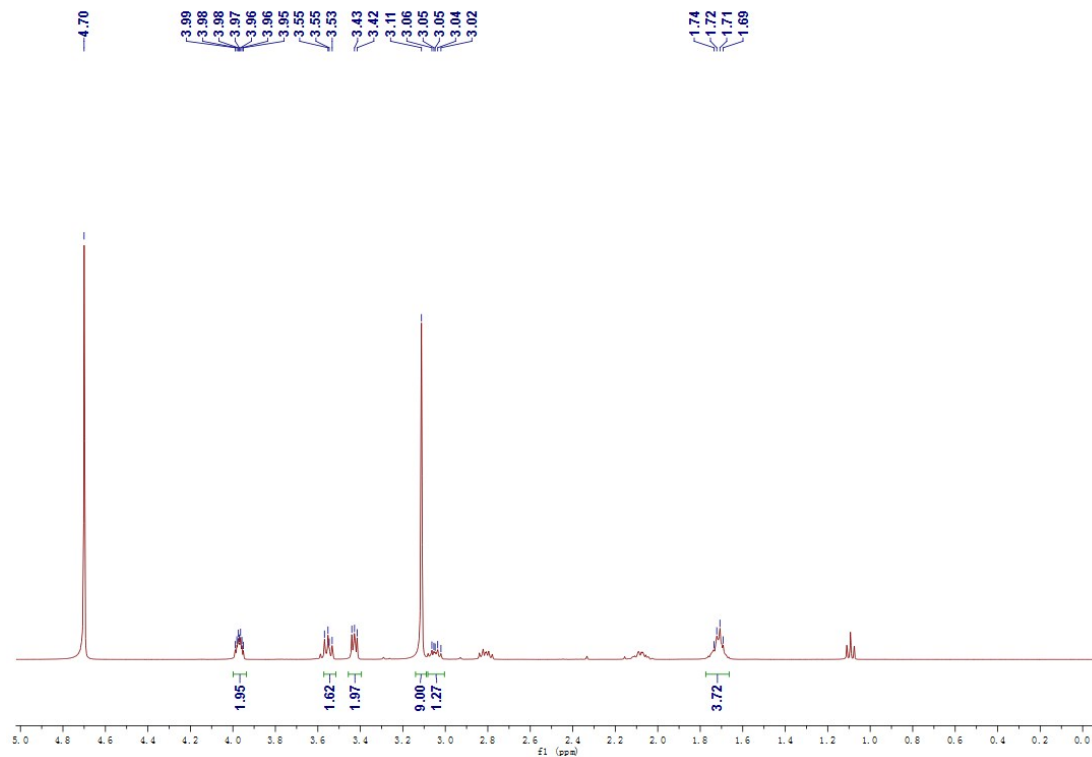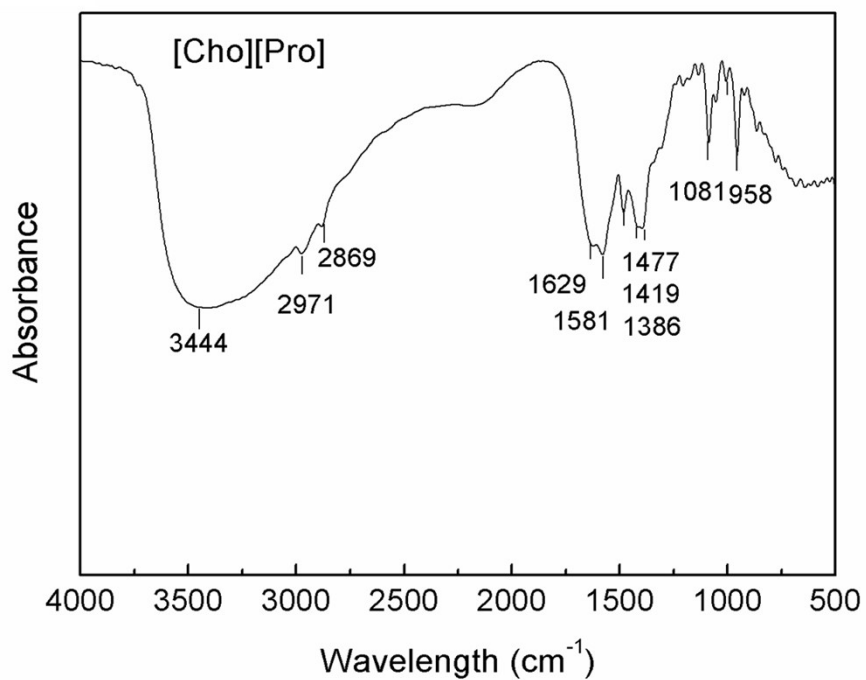

**[C<sub>4</sub>mim][Val]**. <sup>1</sup>H NMR (400 MHz, D<sub>2</sub>O) δ: 0.75 – 0.77 (t, *J* = 8.0 Hz, 3H, CH<sub>3</sub>), 0.81 – 0.84 (dd, *J* = 12 Hz, 6H, CH<sub>3</sub>, CH<sub>3</sub>), 1.17 – 1.23 (m, 2H, CH<sub>2</sub>), 1.71 – 1.77 (m, 3H, CH, CH<sub>2</sub>), 2.96 – 2.97 (m, *J* = 4.0 Hz, 1H, CH-N), 3.79 (s, 3H, CH<sub>3</sub>), 4.08 – 4.10 (t, *J* = 8.0 Hz, 2H, CH<sub>2</sub>), 3.79 (s, 3H, CH<sub>3</sub>), 4.10 – 4.11 (t, *J* = 4.0 Hz, 2H, CH<sub>2</sub>), 7.33 – 7.38 (s, 3H, =CH, =CH, =CH). IR: **Error!** = 3430, 2958, 2875, 1571, 1457, 1392, 1322, 1164, 958, 620 cm<sup>-1</sup>.

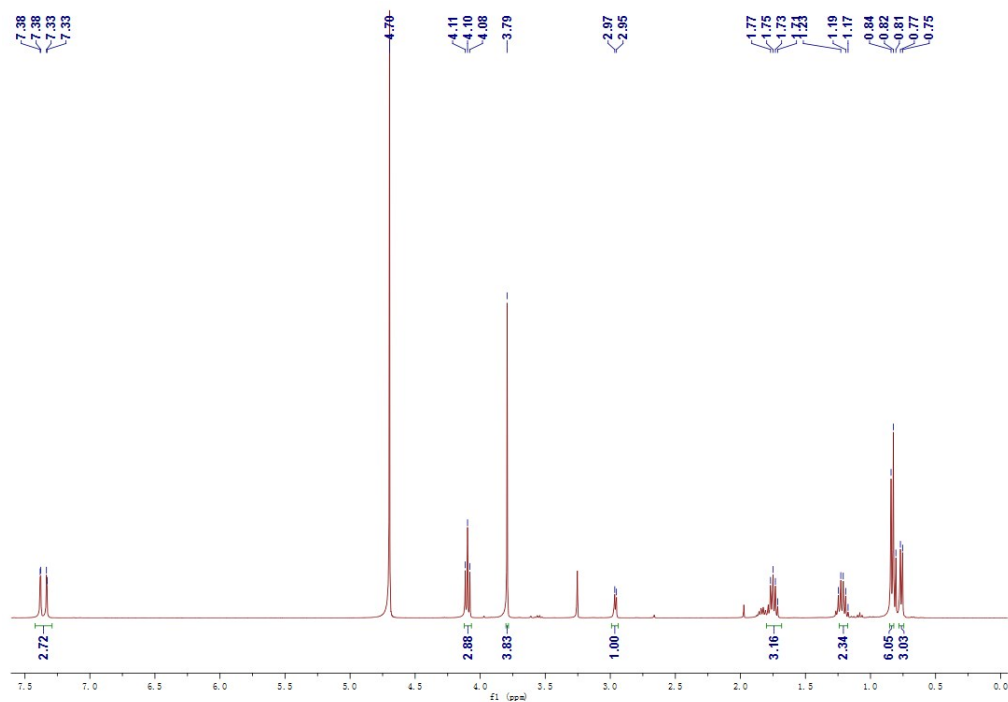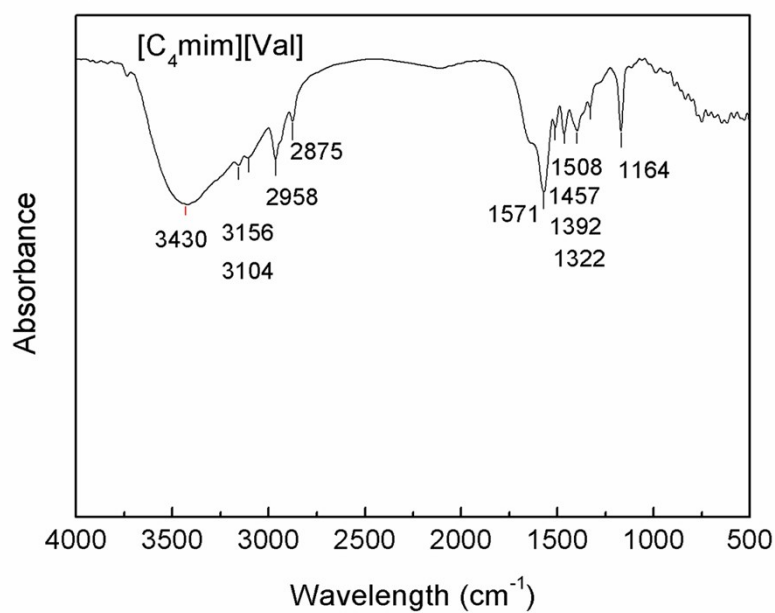



[C<sub>4</sub>mim][Gly]. <sup>1</sup>H NMR (400 MHz, D<sub>2</sub>O) δ: 0.84 – 0.88 (t, *J* = 16 Hz, 3H, CH<sub>3</sub>), 1.23 – 1.26 (m, 2H, CH<sub>2</sub>), 1.75 – 1.82 (m, 2H, CH<sub>2</sub>), 3.14 (s, 2H, CH<sub>2</sub>), 3.83 (s, 3H, CH<sub>3</sub>), 4.11 – 4.15 (m, 2H, CH<sub>2</sub>), 7.36 (s, 1H, =CH), 7.41 (s, 1H, =CH). IR: **Error!**= 3413, 2958, 2869, 1573, 1471, 1402, 1340, 1164, 956, 610 cm<sup>-1</sup>.

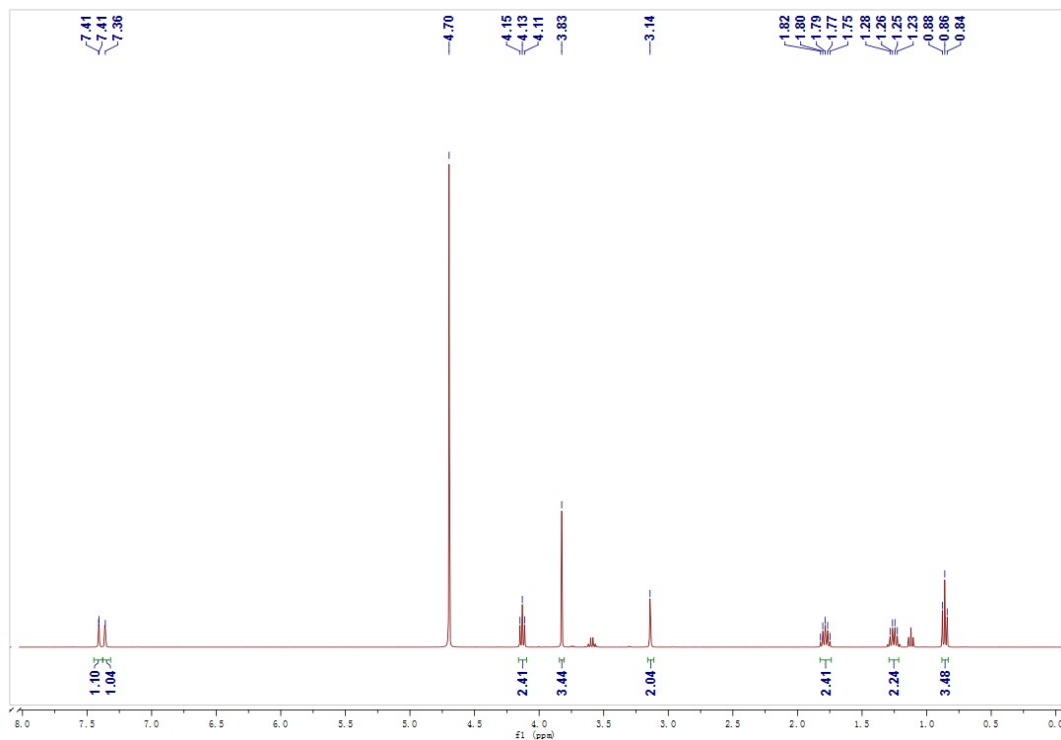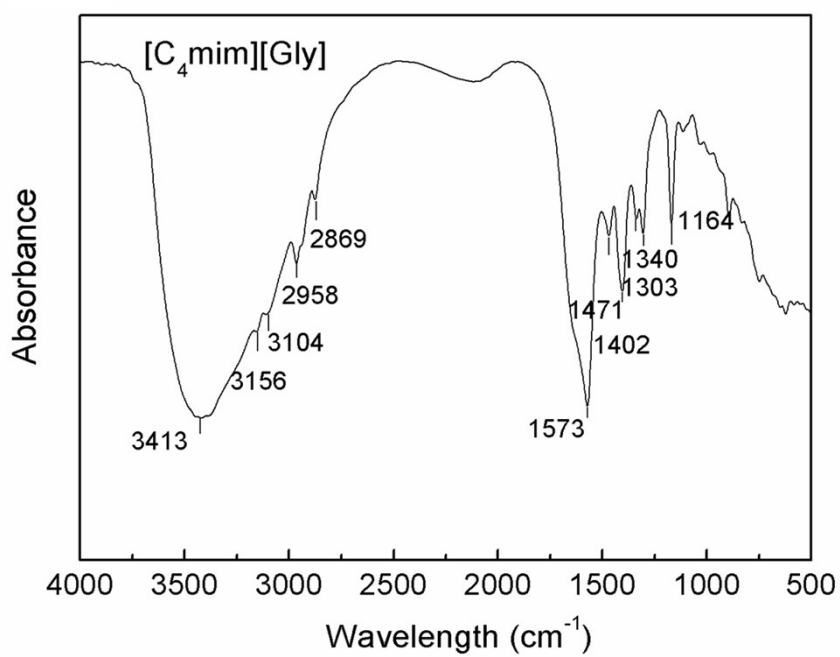

**[C<sub>4</sub>mim][Pro]**. <sup>1</sup>H NMR (400 MHz, D<sub>2</sub>O) δ: 0.83 – 0.86 (t, *J* = 12 Hz, 3H, CH<sub>3</sub>), 1.20 – 1.25 (m, 2H, CH<sub>2</sub>), 1.69 – 1.72 (m, 4H, CH<sub>2</sub>, CH<sub>2</sub>), 1.74 – 1.81 (m, 2H, CH<sub>2</sub>), 3.03 – 3.06 (t, *J* = 12 Hz, 1H, CH-N), 3.52 – 3.58 (m, 2H, CH<sub>2</sub>), 3.82 (s, 3H, CH<sub>3</sub>), 4.10 – 4.14 (t, *J* = 16 Hz, 2H, CH<sub>2</sub>), 7.37 (s, 1H, =CH), 7.42 (s, 1H, =CH). IR: **Error!** = 3425, 3112, 2956, 1629, 1571, 1425, 1342, 1301, 1164, 958, 650 cm<sup>-1</sup>.

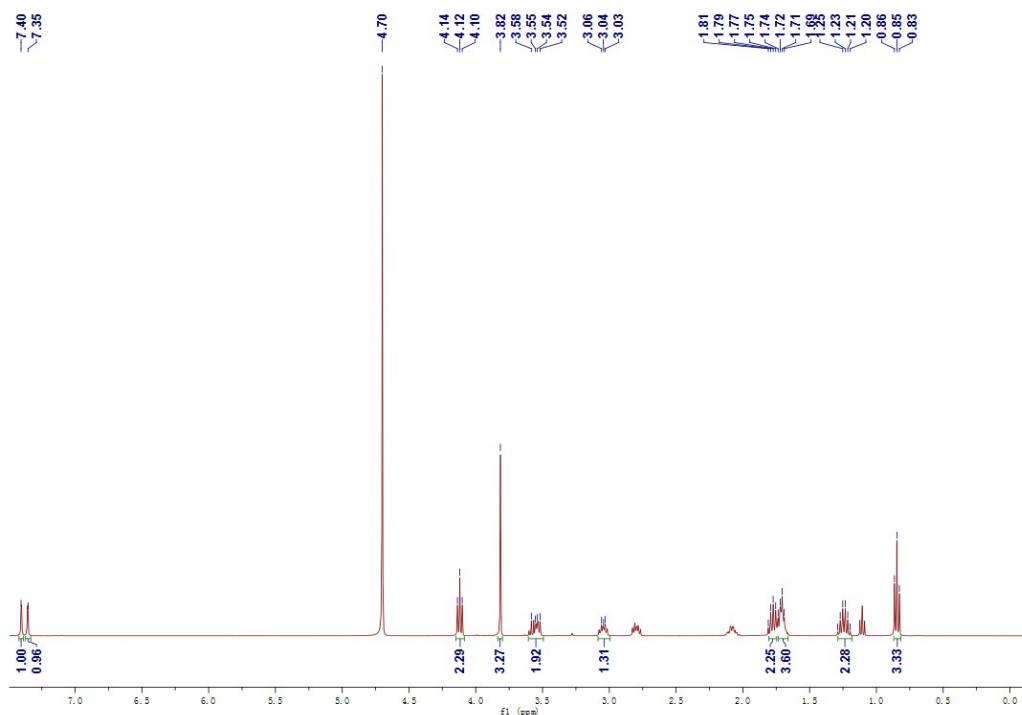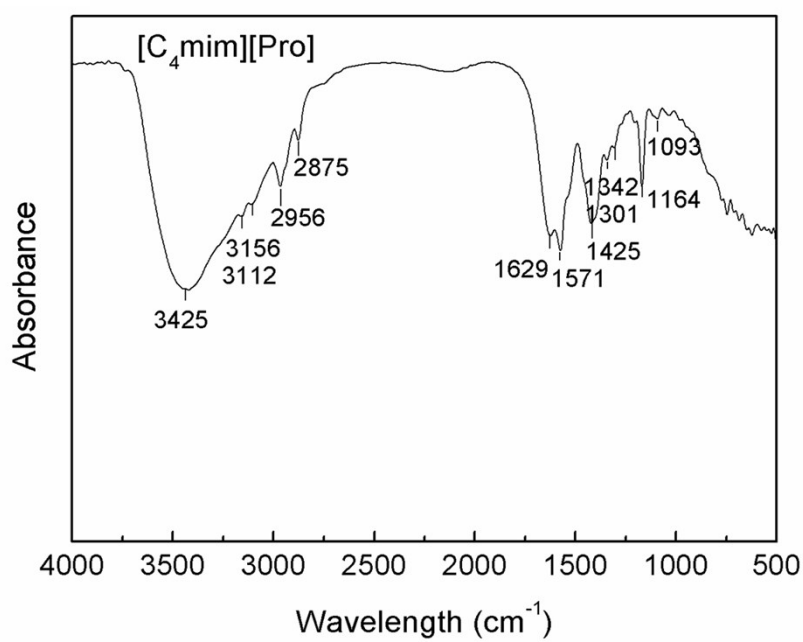

**[C<sub>4</sub>mim][Cys]**. <sup>1</sup>H NMR (400 MHz, D<sub>2</sub>O) δ: 0.77 – 0.81 (t, *J* = 16 Hz, 3H, CH<sub>3</sub>), 1.16 – 1.22 (q, , *J* = 24 Hz, 2H, CH<sub>2</sub>), 1.70 – 1.76 (m, 2H, CH<sub>2</sub>), 2.56 – 2.86 (d, 2H, CH<sub>2</sub>), 3.31 – 3.34 (t, *J* = 12 Hz, 1H, CH-N), 3.77 (s, 3H, CH<sub>3</sub>), 4.05 – 4.09 (t, *J* = 12 Hz, 2H, CH<sub>2</sub>), 7.31 (s, 1H, =CH), 7.36 (s, 1H, =CH). IR: **Error!** = 3432, 3156, 2964, 1596, 1463, 1390, 1284, 1170, 1164, 662 cm<sup>-1</sup>.

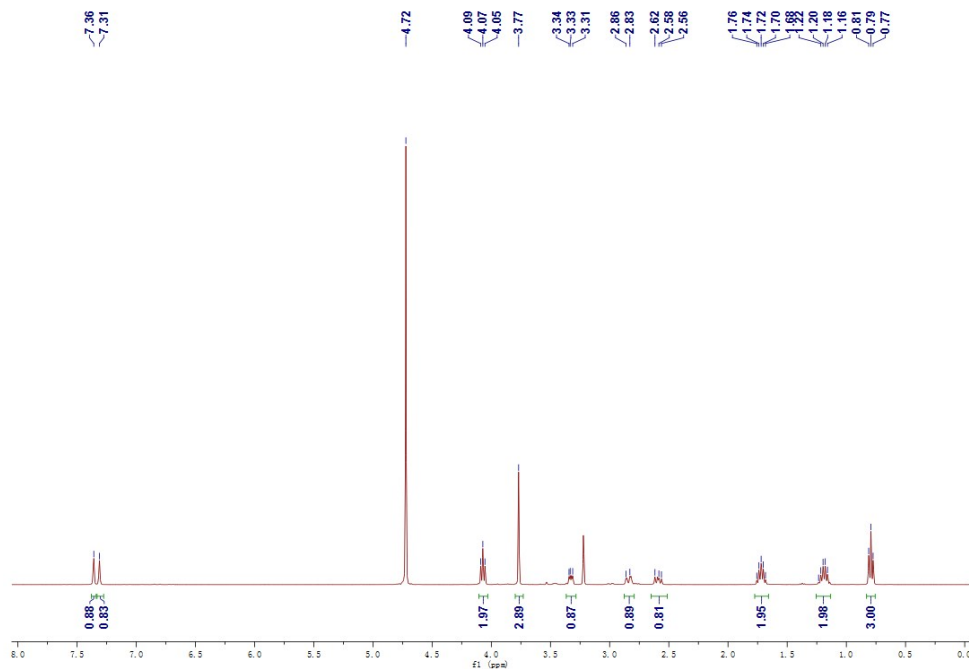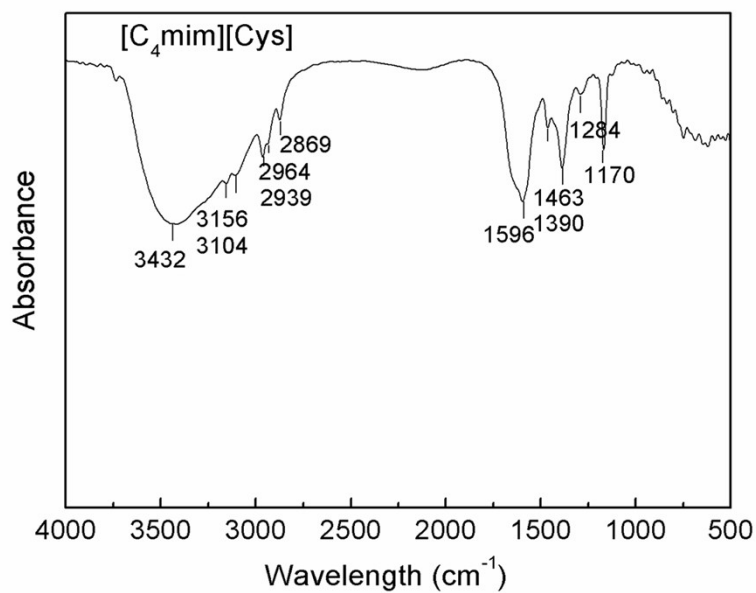

**[C<sub>4</sub>mim][Phe]**. <sup>1</sup>H NMR (400 MHz, D<sub>2</sub>O) δ: 0.84 – 0.88 (t, *J* = 16 Hz, 3H, CH<sub>3</sub>), 1.22 – 1.27 (m, 2H, CH<sub>2</sub>), 1.72 – 1.80 (m, 2H, CH<sub>2</sub>), 2.75 – 2.80 (m, 2H, CH<sub>2</sub>), 3.43 – 3.46 (t, *J* = 12 Hz, 1H, CH-N), 3.79 (s, 3H, CH<sub>3</sub>), 4.07 – 4.11 (q, *J* = 16 Hz, 2H, CH<sub>2</sub>), 7.20 – 7.30 (m, 5H, C<sub>6</sub>H<sub>5</sub>), 7.33 (s, 1H, =CH), 7.37 (s, 1H, =CH). IR: **Error!** = 3444, 3151, 2964, 2140, 1571, 1498, 1342, 1166, 755, 707, 624 cm<sup>-1</sup>.

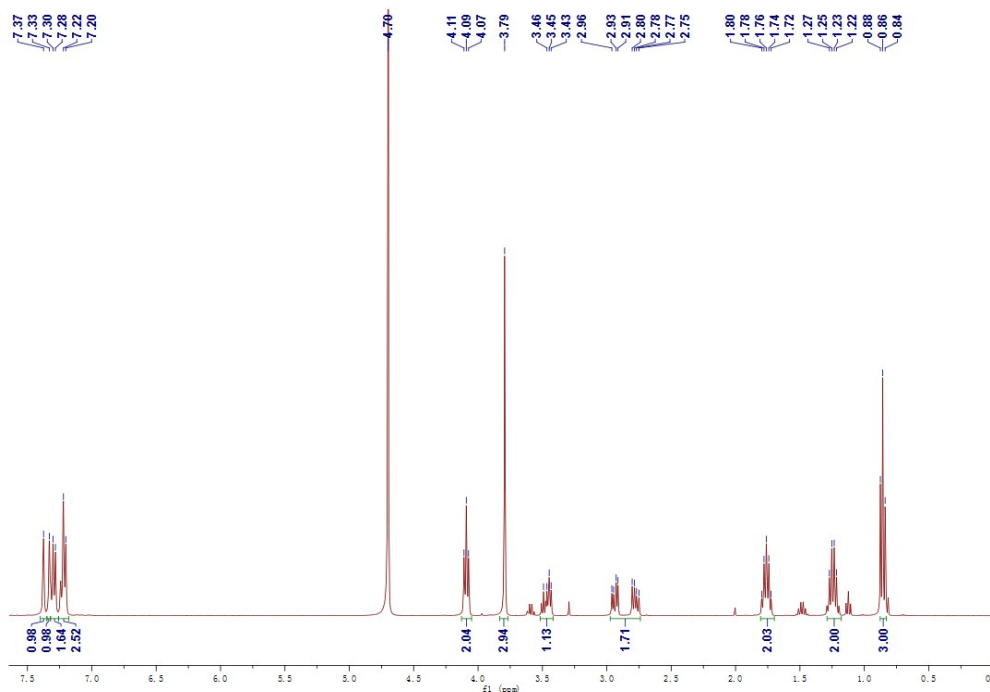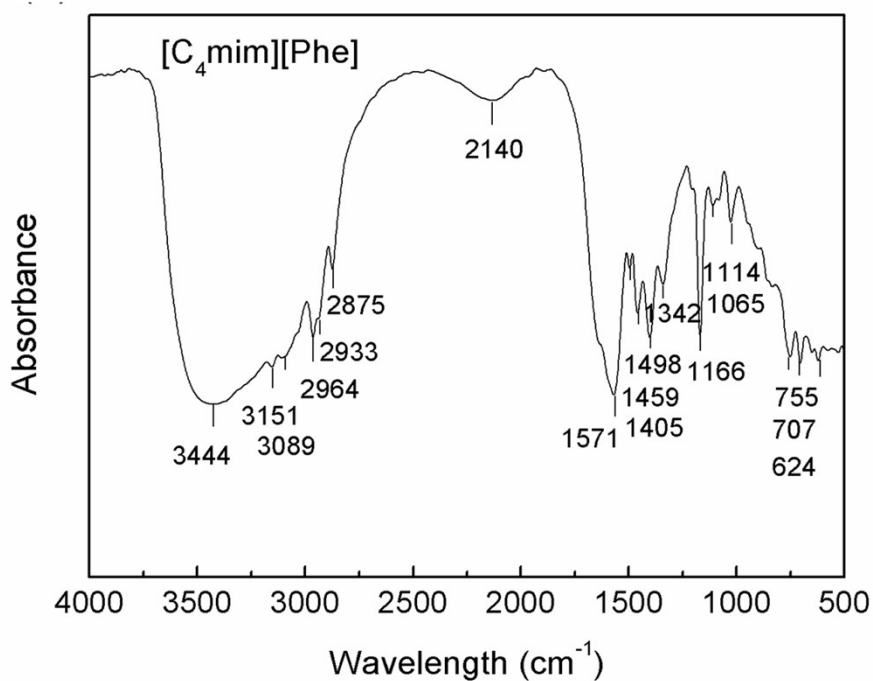

**[C<sub>4</sub>mim][Asp]**. <sup>1</sup>H NMR (400 MHz, D<sub>2</sub>O) δ: 0.84 – 0.88 (t, *J* = 16 Hz, 3H, CH<sub>3</sub>), 1.22 – 1.29 (m, 2H, CH<sub>2</sub>), 1.75 – 1.83 (m, 2H, CH<sub>2</sub>), 2.58 – 2.64 (t, *J* = 24 Hz, 2H, CH<sub>2</sub>), 3.83 (s, 3H, CH<sub>3</sub>), 4.12 – 4.16 (t, *J* = 16 Hz, 2H, CH<sub>2</sub>), 7.38 (s, 1H, =CH), 7.42 (s, 1H, =CH), 8.85 (s, 1H, =CH). IR: **Error!** = 3147, 2966, 1612, 1579, 1392, 1303, 1157, 1110, 968 cm<sup>-1</sup>.

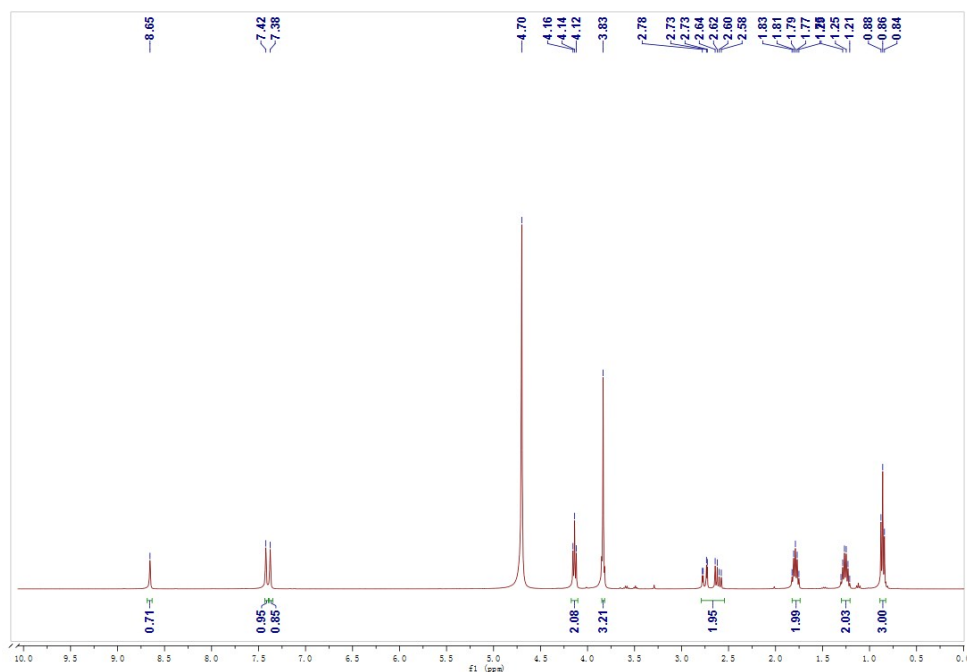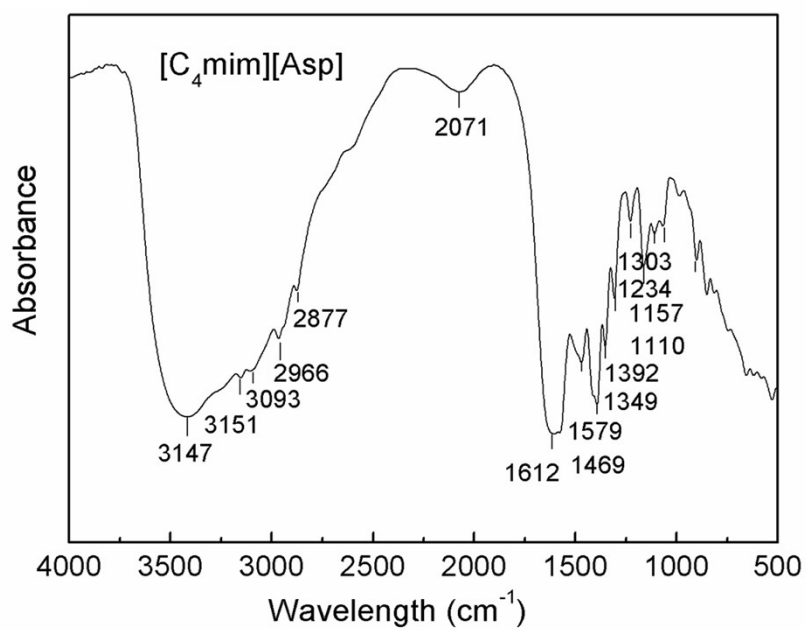

**[C<sub>4</sub>mim][His]**. <sup>1</sup>H NMR (400 MHz, D<sub>2</sub>O) δ: 0.83 – 0.86 (t, *J* = 12 Hz, 3H, CH<sub>3</sub>), 1.21 – 1.26 (m, 2H, CH<sub>2</sub>), 1.73 – 1.78 (m, 2H, CH<sub>2</sub>), 2.75 – 2.88 (t, *J* = 8.0, 8.0 Hz, 2H, CH<sub>2</sub>), 3.41 – 3.44 (t, *J* = 12 Hz, 1H, CH-N), 3.83 (s, 3H, CH<sub>3</sub>), 4.09 – 4.12 (t, *J* = 12 Hz, 2H, CH<sub>2</sub>), 6.84 (s, 1H, =CH), 7.34 (s, 1H, =CH), 7.39 (s, 1H, =CH), 7.59 (s, 1H, =CH). IR: **Error!** = 3425, 3156, 2964, 1565, 1463, 1340, 1166, 831, 748 cm<sup>-1</sup>.

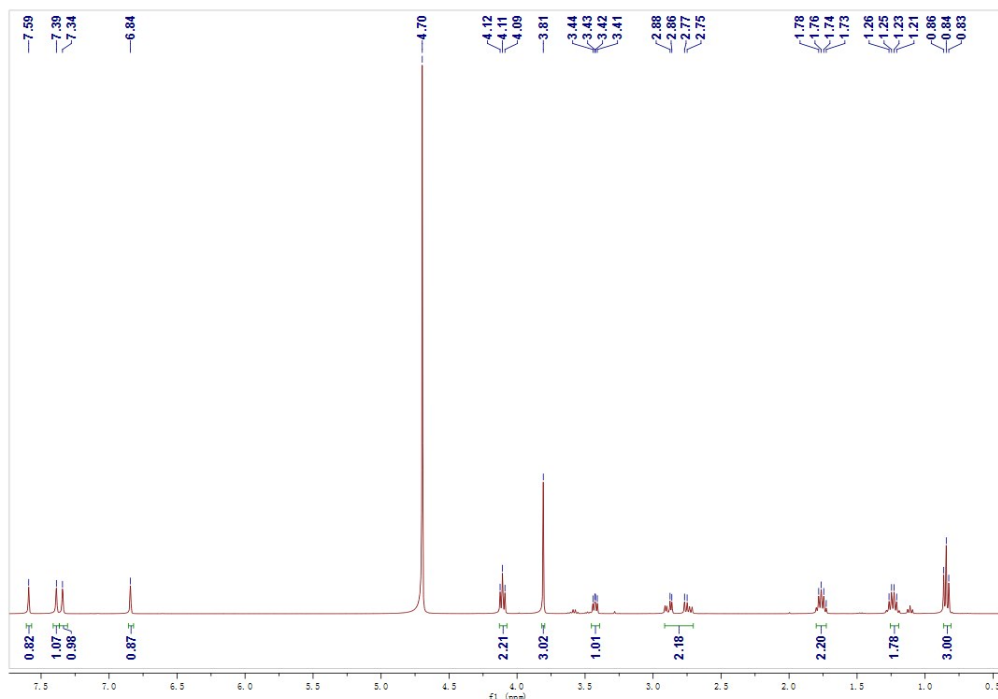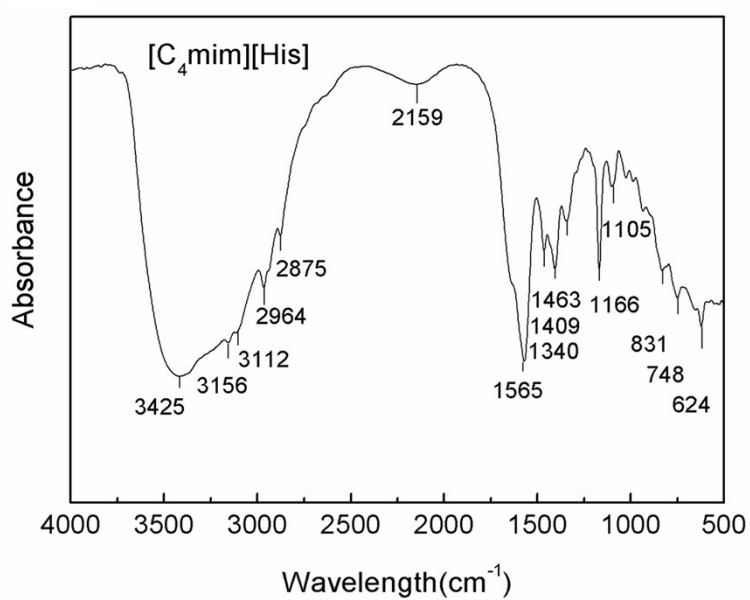

[C<sub>2</sub>mim][Cys]. <sup>1</sup>H NMR (400 MHz, D<sub>2</sub>O) δ: 1.34 – 1.38 (t, *J* = 12 Hz, 3H, CH<sub>3</sub>), 2.59 – 2.65 (t, *J* = 24 Hz, 2H, CH<sub>2</sub>), 3.36 – 3.39 (d, 1H, CH-N), 3.75 (s, 3H, CH<sub>3</sub>), 4.06 – 4.12 (q, *J* = 24 Hz, 2H, CH<sub>2</sub>), 7.28 (s, 1H, =CH), 7.36 (s, 1H, =CH). IR: **Error!** = 3455, 2991, 1598, 1457, 1388, 1168, 962 cm<sup>-1</sup>.

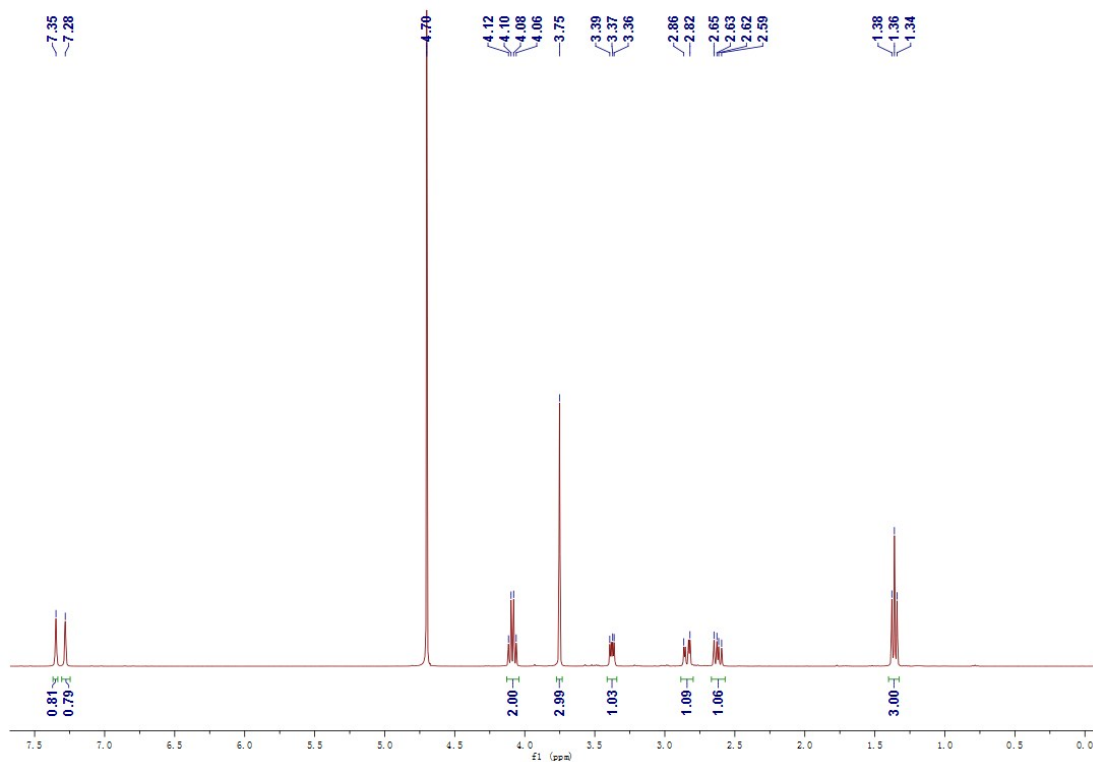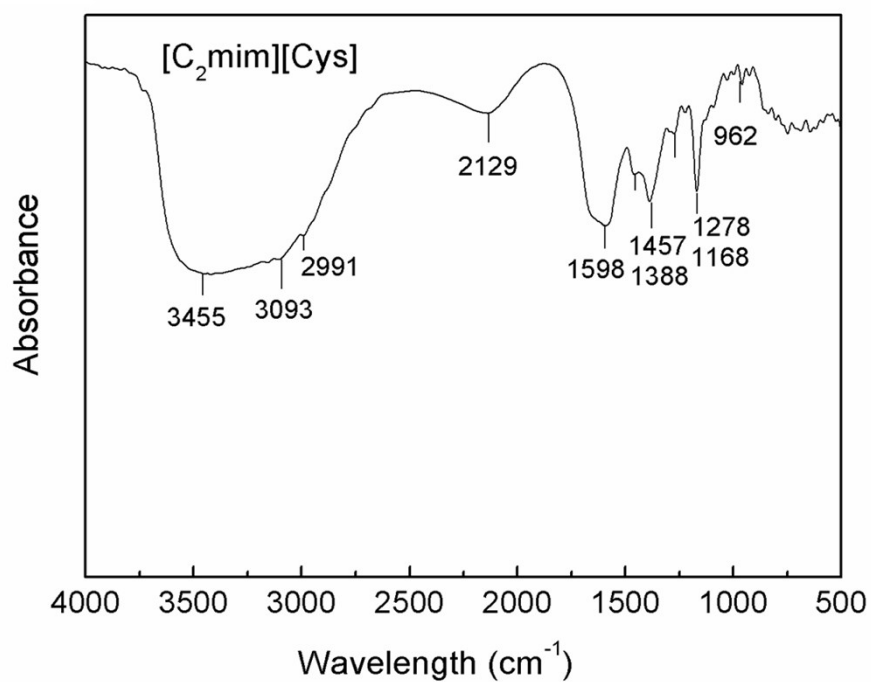

**[C<sub>6</sub>mim][Cys]**. <sup>1</sup>H NMR (400 MHz, D<sub>2</sub>O) δ: 0.75 – 0.77 (t, *J* = 8.0 Hz, 3H, CH<sub>3</sub>), 0.80 – 0.84 (m, 6H, CH<sub>2</sub>, CH<sub>2</sub>, CH<sub>2</sub>), 1.71 – 1.77 (m, 2H, CH<sub>2</sub>), 2.95 – 2.96 (t, *J* = 4.0 Hz, 1H, CH-N), 3.80 (s, 3H, CH<sub>3</sub>), 4.08 – 4.12 (m, 2H, CH<sub>2</sub>), 7.34 – 2.20 (d, 2H, =CH, =CH). IR: **Error!**  
= 3455, 2991, 1598, 1457, 1388, 1168, 962 cm<sup>-1</sup>.

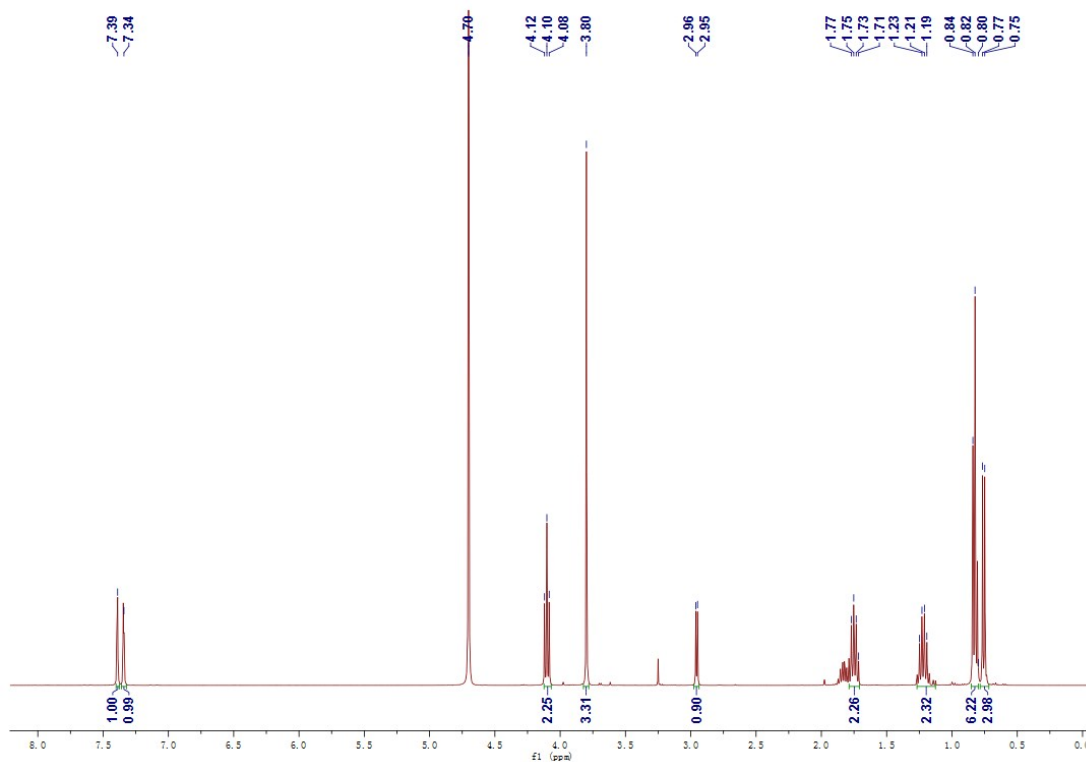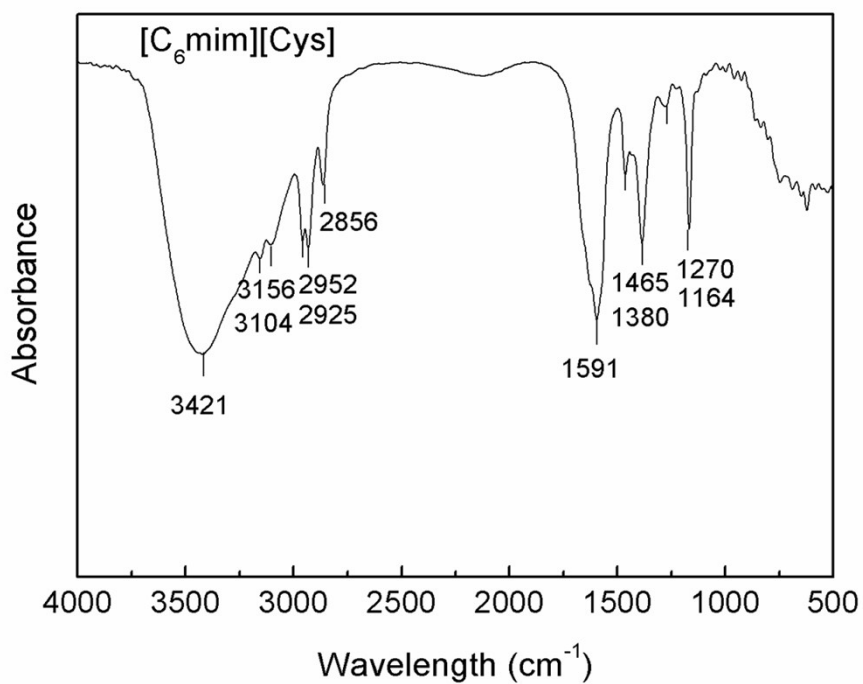



**[N<sub>2,2,2,2</sub>][Cys]**. <sup>1</sup>H NMR (400 MHz, D<sub>2</sub>O) δ: 0.80 – 0.89 (d, *J* = 36 Hz, 2H, CH<sub>2</sub>), 1.18 – 1.22 (t, *J* = 16 Hz, 12H, CH<sub>3</sub>, CH<sub>3</sub>, CH<sub>3</sub>, CH<sub>3</sub>, CH<sub>3</sub>, CH<sub>3</sub>), 3.02 – 3.03 (t, *J* = 4.0 Hz, 1H, CH-N), 3.16 – 3.22 (t, *J* = 24 Hz, 8H, CH<sub>2</sub>, CH<sub>2</sub>, CH<sub>2</sub>, CH<sub>2</sub>). IR: **Error!** = 3457, 2989, 1585, 1457, 1396, 1174, 1002, 786 cm<sup>-1</sup>.

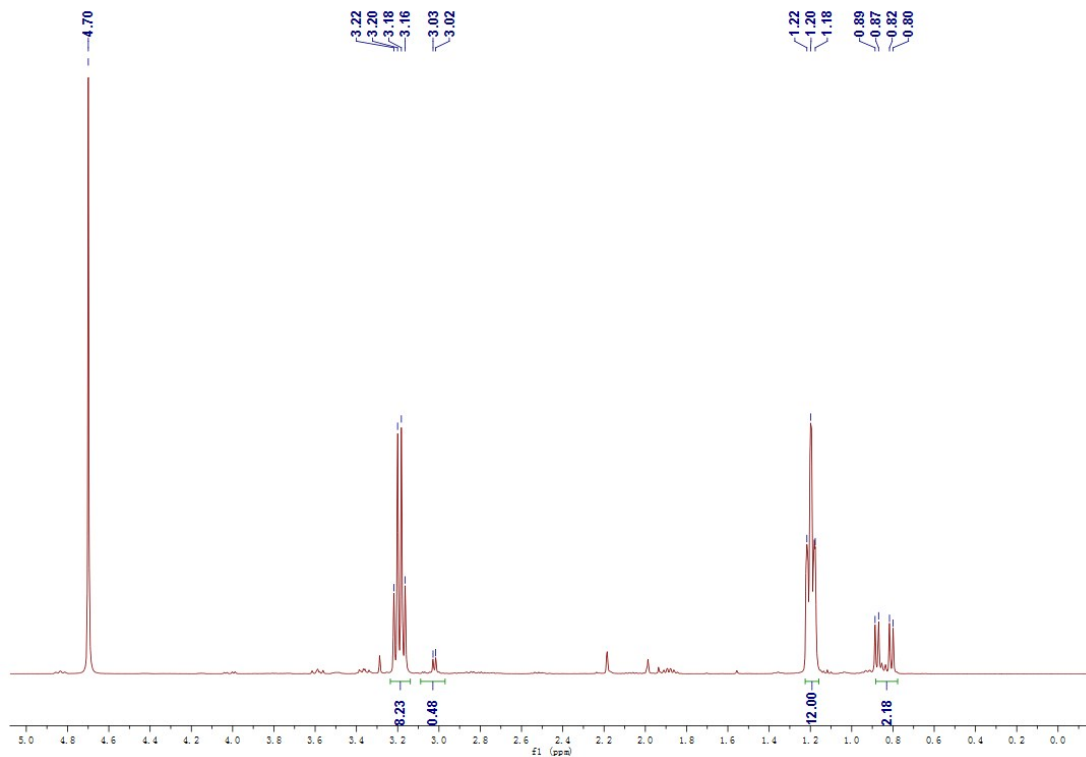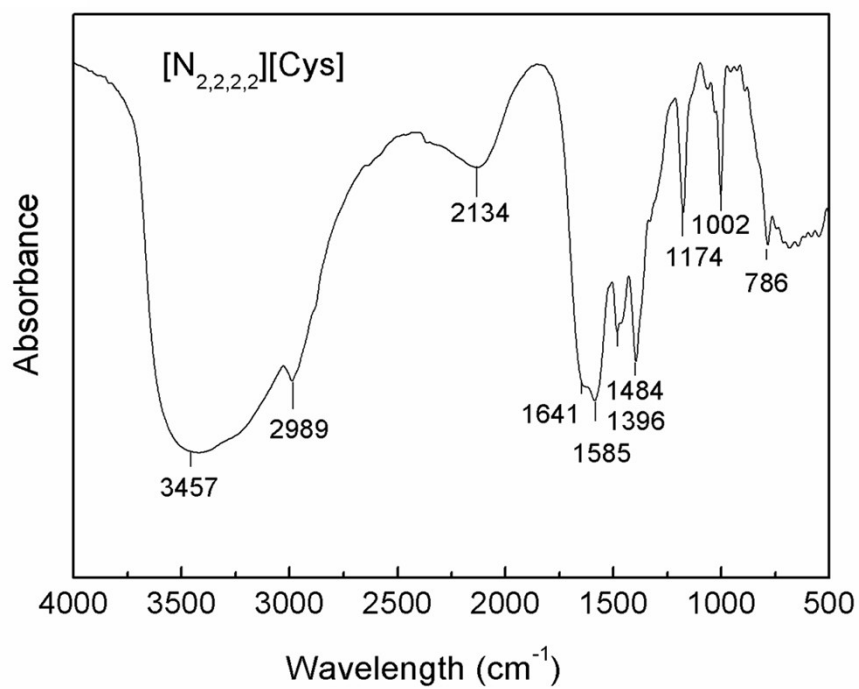

**[N<sub>4,4,4,4</sub>][Cys]**. <sup>1</sup>H NMR (400 MHz, D<sub>2</sub>O) δ: 0.82 – 0.86 (t, *J* = 16 Hz, 12H, CH<sub>3</sub>, CH<sub>3</sub>, CH<sub>3</sub>, CH<sub>3</sub>), 1.21 – 1.28 (m, 8H, CH<sub>2</sub>, CH<sub>2</sub>, CH<sub>2</sub>, CH<sub>2</sub>), 1.50 – 1.58 (m, 8H, CH<sub>2</sub>, CH<sub>2</sub>, CH<sub>2</sub>, CH<sub>2</sub>), 2.71 – 2.90 (d, 2H, CH<sub>2</sub>), 3.07 – 3.11 (t, *J* = 16 Hz, 8H, CH<sub>2</sub>, CH<sub>2</sub>, CH<sub>2</sub>, CH<sub>2</sub>), 3.47 – 3.54 (d, 1H, CH-N). IR: **Error!** = 3430, 2960, 1575, 1463, 1334, 1172, 991 cm<sup>-1</sup>.

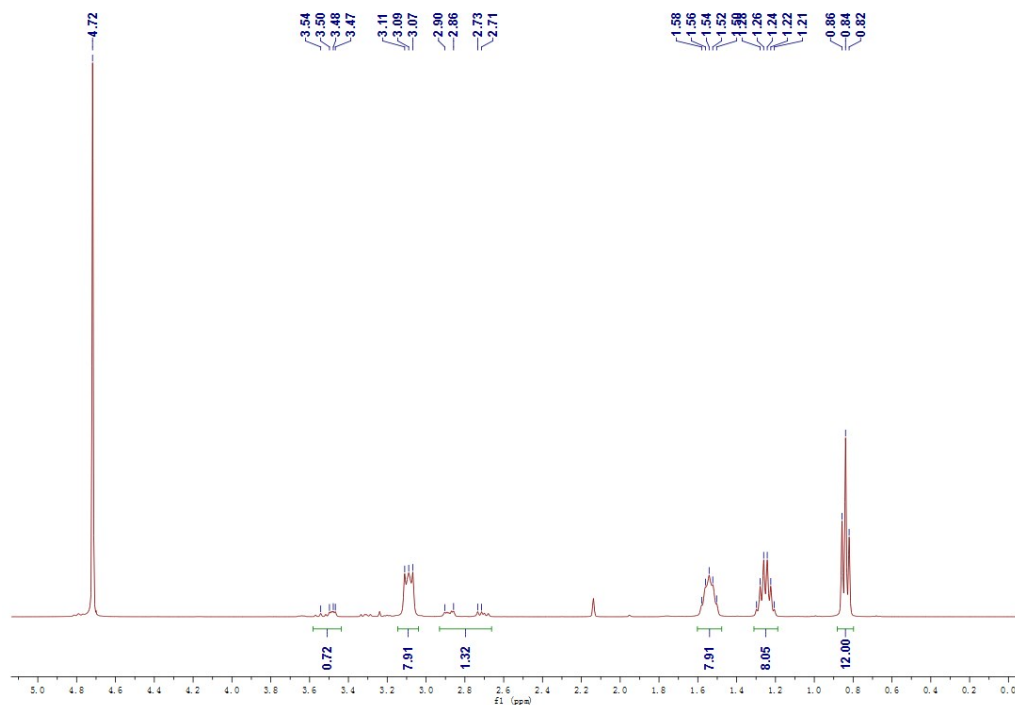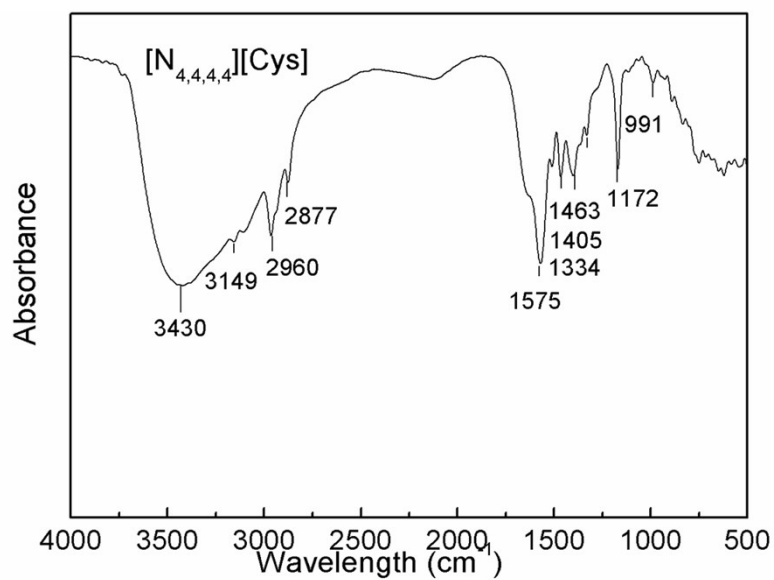

[Pyr][Cys].  $^1\text{H}$  NMR (400 MHz,  $\text{D}_2\text{O}$ )  $\delta$ : 1.24 – 1.28 (t,  $J = 16$  Hz, 3H,  $\text{CH}_3$ ), 2.09 (m, 4H,  $\text{CH}_2$ ,  $\text{CH}_2$ ), 2.44 – 2.55 (m, 2H,  $\text{CH}_2$ ), 2.90 (s, 3H,  $\text{CH}_3$ ), 3.21 – 3.25 (t,  $J = 16$  Hz, 1H, CH-N), 3.27 – 3.32 (q,  $J = 20$  Hz, 2H,  $\text{CH}_2$ ), 3.36 – 3.37 (m, 4H,  $\text{CH}_2$ ,  $\text{CH}_2$ ). IR: **Error!** = 3411, 2983, 1598, 1469, 1388, 1295, 1029, 995  $\text{cm}^{-1}$ .

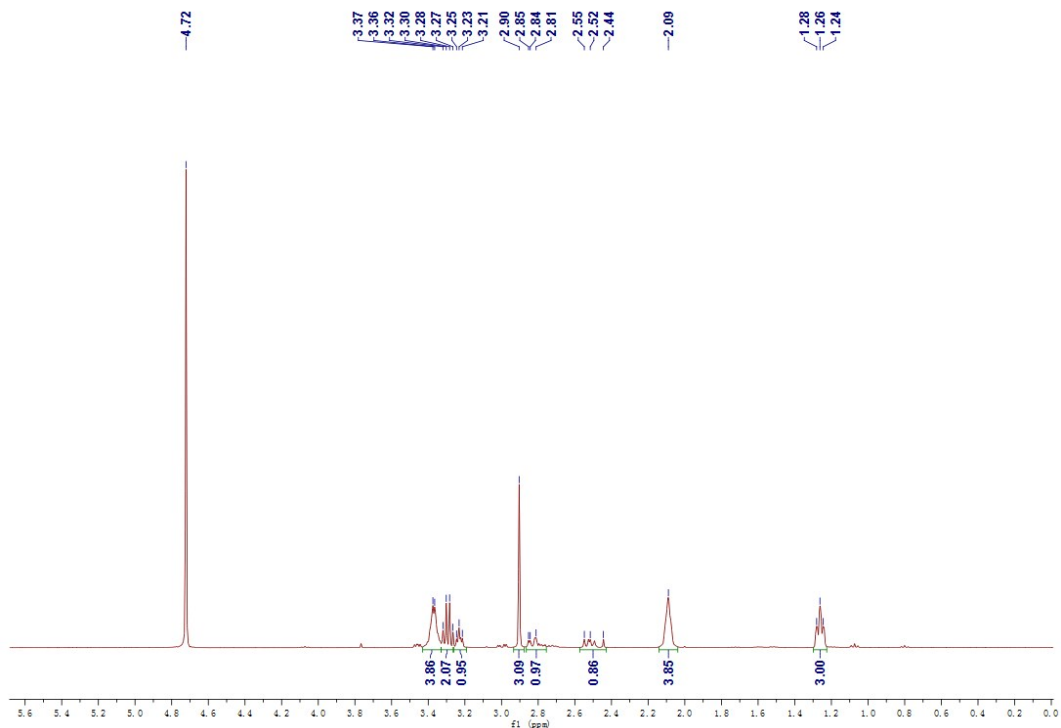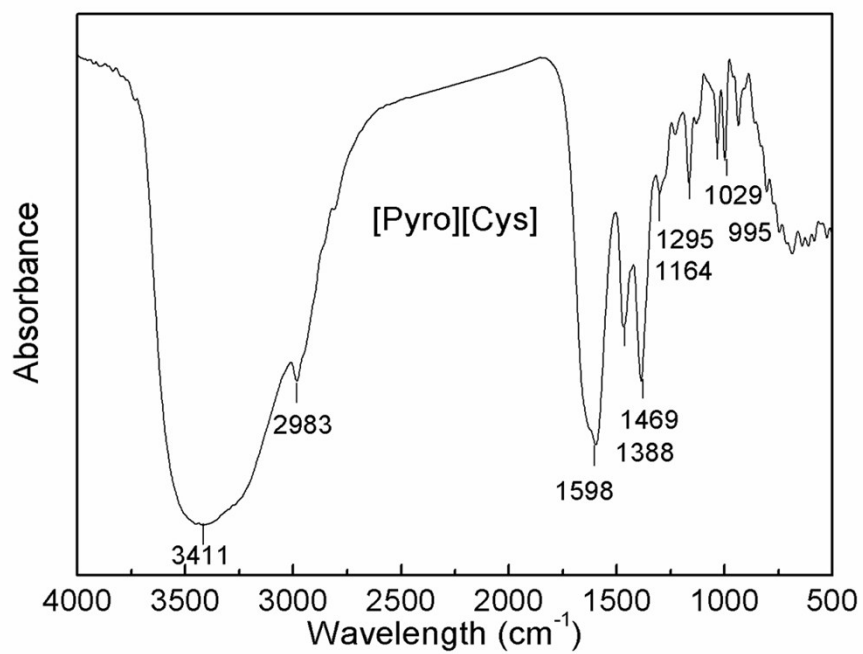

**[Pip][Cys]**.  $^1\text{H}$  NMR (400 MHz,  $\text{D}_2\text{O}$ )  $\delta$ : 1.23 – 1.25 (t,  $J$  = 8.0 Hz, 3H,  $\text{CH}_3$ ), 1.54 – 1.59 (m, 2H,  $\text{CH}_2$ ), 1.79 (m, 4H,  $\text{CH}_2$ ,  $\text{CH}_2$ ), 2.16 (d, 1H, CH-N), 2.91 (s, 3H,  $\text{CH}_3$ ), 3.22 – 3.14 (m, 4H,  $\text{CH}_2$ ,  $\text{CH}_2$ ), 3.30 – 3.33 (m, 4H,  $\text{CH}_2$ ,  $\text{CH}_2$ ). IR: **Error!** = 3455, 2956, 1594, 1469, 1392, 1170, 944  $\text{cm}^{-1}$ .

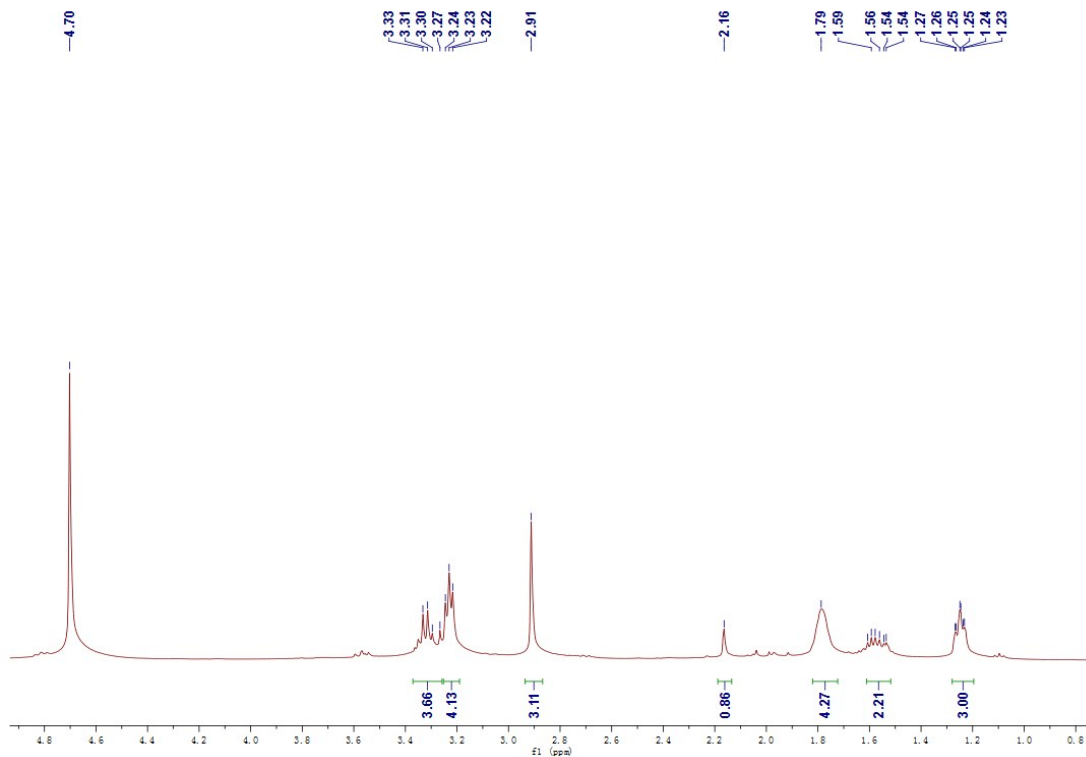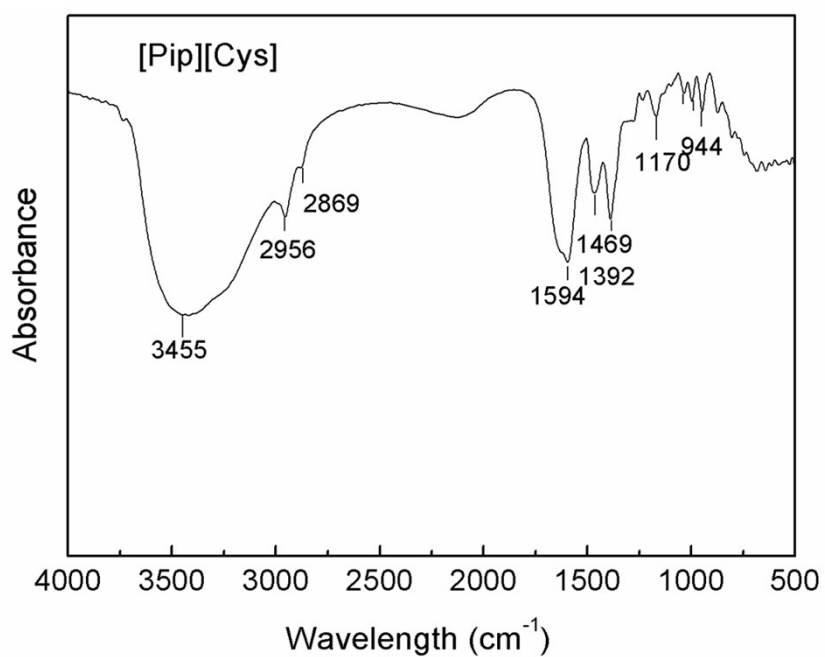

Supplement: RA-009-C8RA06929H-s001.pdf [file RA-009-C8RA06929H-s001.pdf]
